# Supplementary material for: Molecular organization of fibroin heavy chain and mechanism of fibre formation in Bombyx mori
Source: Springer Nature journal article supplement (doi:10.1038/s42003-024-06474-1), 2024-06-29
Supplement: MOESM2 [file 42003_2024_6474_MOESM2_ESM.pdf]

# Supplementary Information for

## Molecular organization of fibroin heavy chain and mechanism of fibre formation in *Bombyx mori*.

R.O. Moreno-Tortolero,<sup>1,2\*</sup> Y. Luo,<sup>3</sup> F. Parmeggiani,<sup>1,3</sup> N. Skaer,<sup>4</sup> R. Walker,<sup>4</sup> L. Serpell,<sup>5</sup> C. Holland,<sup>6</sup> S.A. Davis<sup>1\*</sup>

Corresponding author: [ro.morenotortolero@bristol.ac.uk](mailto:ro.morenotortolero@bristol.ac.uk), [s.a.davis@bristol.ac.uk](mailto:s.a.davis@bristol.ac.uk)

### Supplementary Note

#### 1- NOESY

Within the entire sequence of FibH, Y is only found next to A a total of 13 times, out of the 275 Y residues present. However, the <sup>1</sup>H-<sup>1</sup>H NOESY experiments showed consistent NOE signals between the A βH and Y δ,εH (aromatic). It is known that NOE signal depends inversely on the interatomic distance to the sixth power; or alternatively, the distance is directly proportional to the intensity to the -1/6 power. Thus, generally for NOE signal to appear, the two atoms need to be within about 6 Å. In fact, after using the internal Y interatomic distances as mean of calibration, it was possible to estimate average distances between A βH and Y δH to be about 3.4 Å and between A and Y εH 3.3 Å. Although these might be underestimated. There are 221 Y residues within the repetitive domains in total, with an estimated of 74 motifs that would place Y next to A in an inter-strand motif as described in the main text (Figure 2), thus after this adjustment, the estimated distance would be about 2.2-2.3 Å between the aromatic protons of Y and A βH, in an almost perfect agreement with the model (ca. 2.5 Å). Similar calculations can be made for the observed and expected NOEs from Y to S or V, where Y to S are expected to be similarly across strand distances at least 19 times, and Y to V intra-strand distances (motifs VGY) a total of 27 times, the expected distances are of about 2.4-2.8 Å and about 3.2-3.7 Å, while the corrected measured distances are 2.1 Å and 2.3 Å, respectively.

#### 2- Polymer viscosity

For polymers beyond a critical entanglement concentration, the viscosity follows a power law proportionality to the molecular weight as shown in Equation 1.

$$\eta = kM^a \quad \text{Equation 1}$$

Where  $\eta$  is the shear viscosity,  $k$  is a polymer dependent constant,  $M$  is the molecular weight, and  $a$  is the proportionality exponent, which for most polymers assumes the value of 3.5 with very low deviation for a myriad of polymers. So much so that the proportionality is often directly expressed with this value. Consequently,  $\eta \propto M^{3.5}$  and thus, if one considers the relative molecular weight reduction observed in the SDS-PAGE, it is about half of the original MW. This reduction in MW would be translated in a proportional reduction of  $\eta$  by  $(0.5)^{3.5}$ , or 0.088.

Furthermore, viscometry analysis of the samples, NLSF and RSF, was conducted in the LiBr solutions at 20 wt% of concentration. The standing assumption is that in the LiBr solution, the protein is in its statistical coil conformation as a polymer in solution. As it would be expected, under these conditions, the value of the zero shear viscosity ( $\eta_0$ ) for NLSF and RSF are  $58.1 \pm 0.2$  and  $2.13 \pm 0.02$  Pa.s, respectively. One order of magnitude difference was predicted from the previous power law relationship. The fitting of the experimental curves was done using the Cross method (see equation contained within Figure S19), where viscosity as a function of shear rate ( $\dot{\gamma}$ ), is fitted using the infinite shear viscosity ( $\eta_\infty$ ),  $\eta_0$ , a relaxation time ( $\tau$ ) and a power coefficient ( $m$ ).

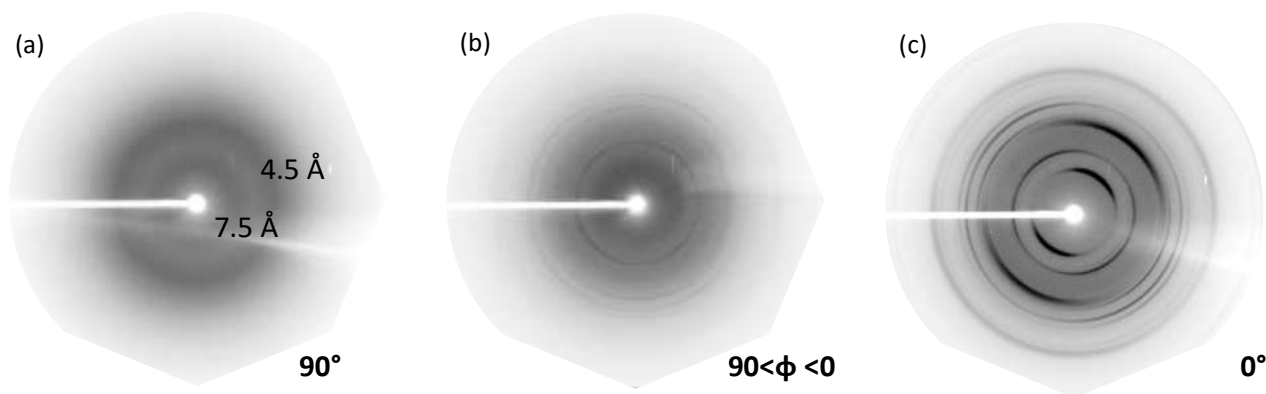

40

41 Figure S1.

42 2D X-ray diffraction in Fibre diffraction obtained from Silk-I film obtained from NLSF at different illumination  
43 angles relative to the film plane. Diffraction pattern obtained at  $0^\circ$  (a), between  $0$  and  $90^\circ$  (b) and  $90^\circ$   
44 illumination (c).

45

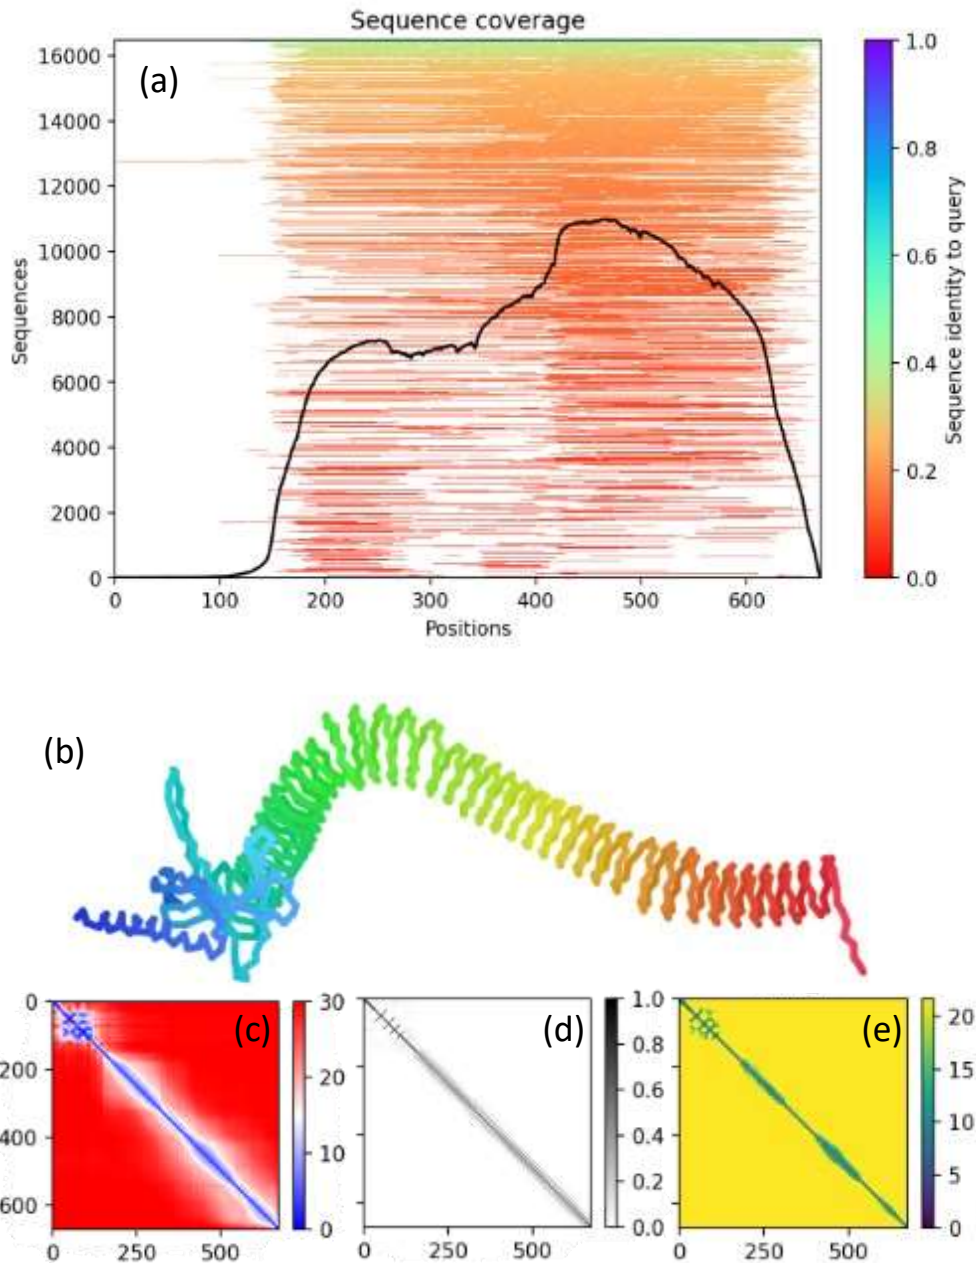

46

47 Figure S2.

48 AF2 simulation of NTD and first repetitive domain. (a) Multisequence alignment (MSA) results from a  
 49 jackhammer database search showing +16000 found sequences aligned to the sequence of the first 650 residues  
 50 of FibH (NTD+ first repetitive domain). (b) Ribbon representation of one of the five obtained models showing  
 51  $\beta$ -solenoid conformation coloured blue to red in an N to C direction. 2D plots of the predicted alignment error  
 52 (PAE, c), predicted contacts (PC, d) and predicted distogram (PD, e) for the shown model. In the 2D plots,  
 53 sequence residue position is plotted both on the horizontal and vertical axis, and the predicted value is in the  
 54 out-of-plane axis, with the range and coloured coding being shown on the right-hand side of each plot.

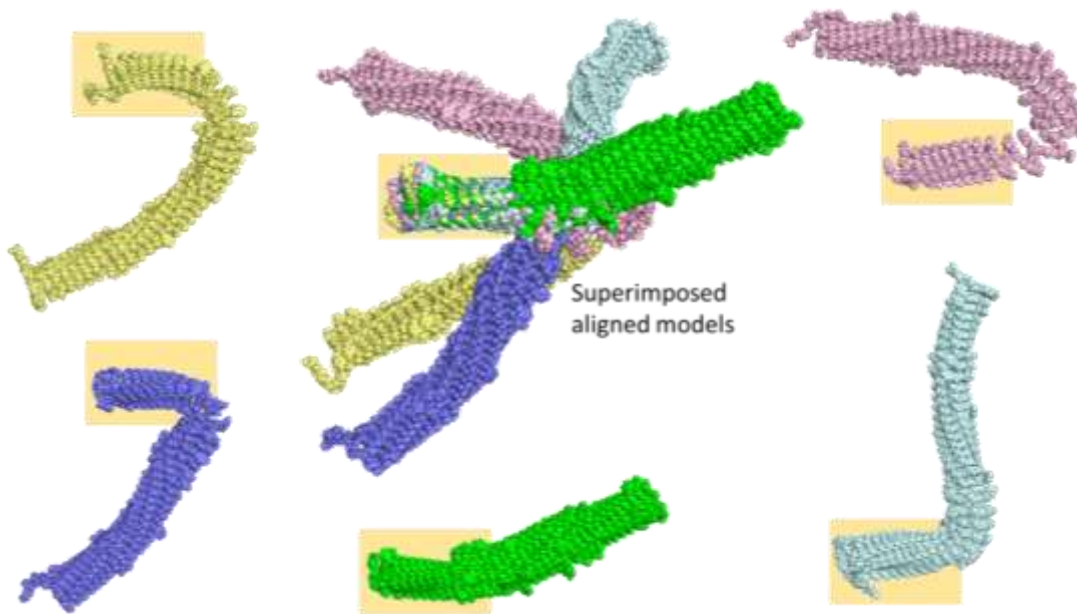

55

56 Figure S3.

57 Conservation of the  $\beta$ -solenoid topology for different generated models. Schematic representation of the five  
58 obtained models for the first repetitive domain, aligned at the apparent first rigid sub-domain and superimposed  
59 (centre) to illustrate possible flexibility of the solenoidal structure.

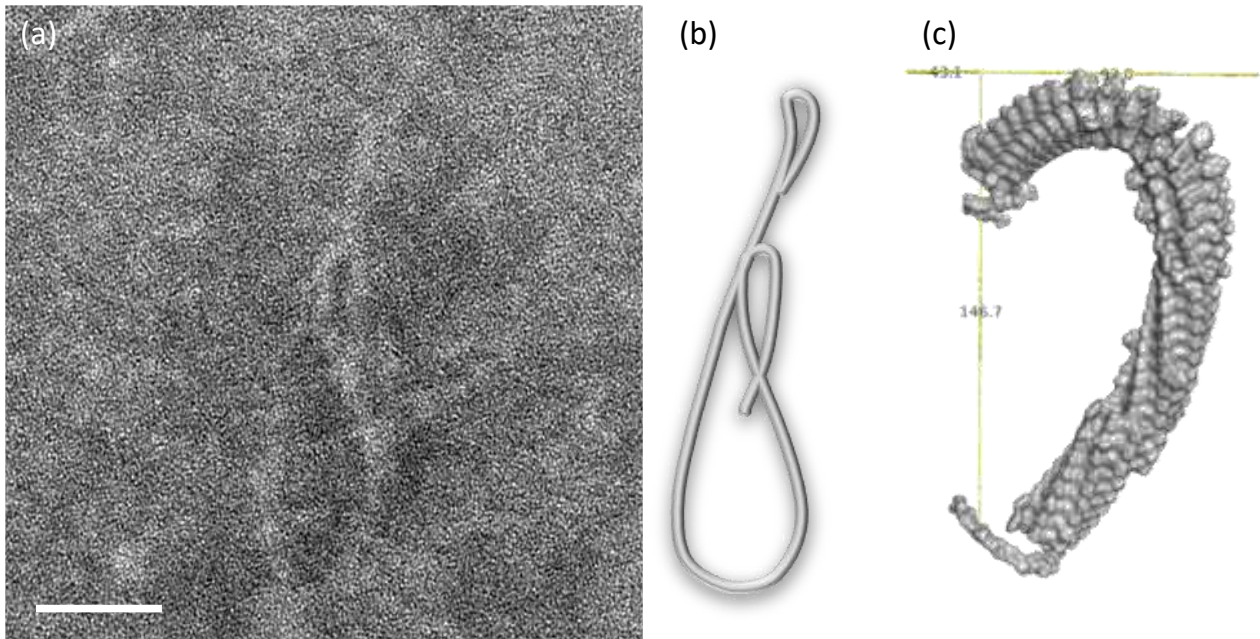

60

61 Figure S4.

62 Analysis and interpretation of TEM micrograph and FibH structure. TEM image obtained from lightly stained  
63 NLSF sample at pH 6 (a), a drawing showing interpretation of the observed profile (b) and a surface  
64 representation of a segment of the obtained model from the first repetitive domain showing similar curvature to  
65 that observed in the image (c). Scale bar 40 nm.

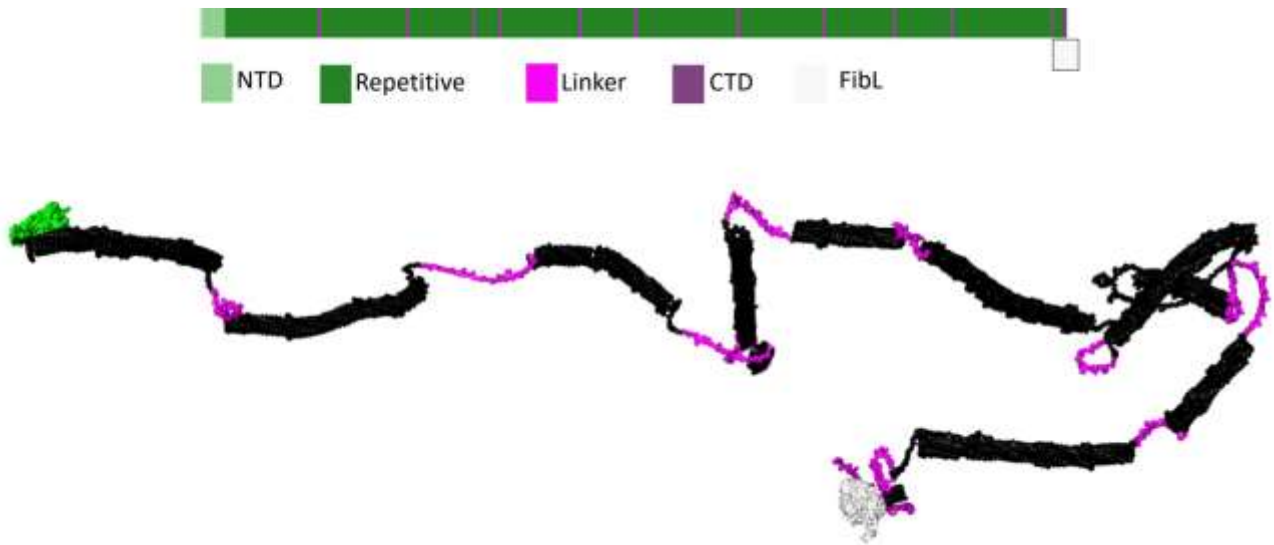

66

67 Figure S5.

68 Structure and topology of full FibH and FibL. At the top, a simplified cartoon of FibH plus FibL showing the  
 69 multidomain structure at the primary level, with a legend of domains and colouring shown below. At the bottom  
 70 is the proposed secondary level structure with the domains coloured following the previous cartoon.

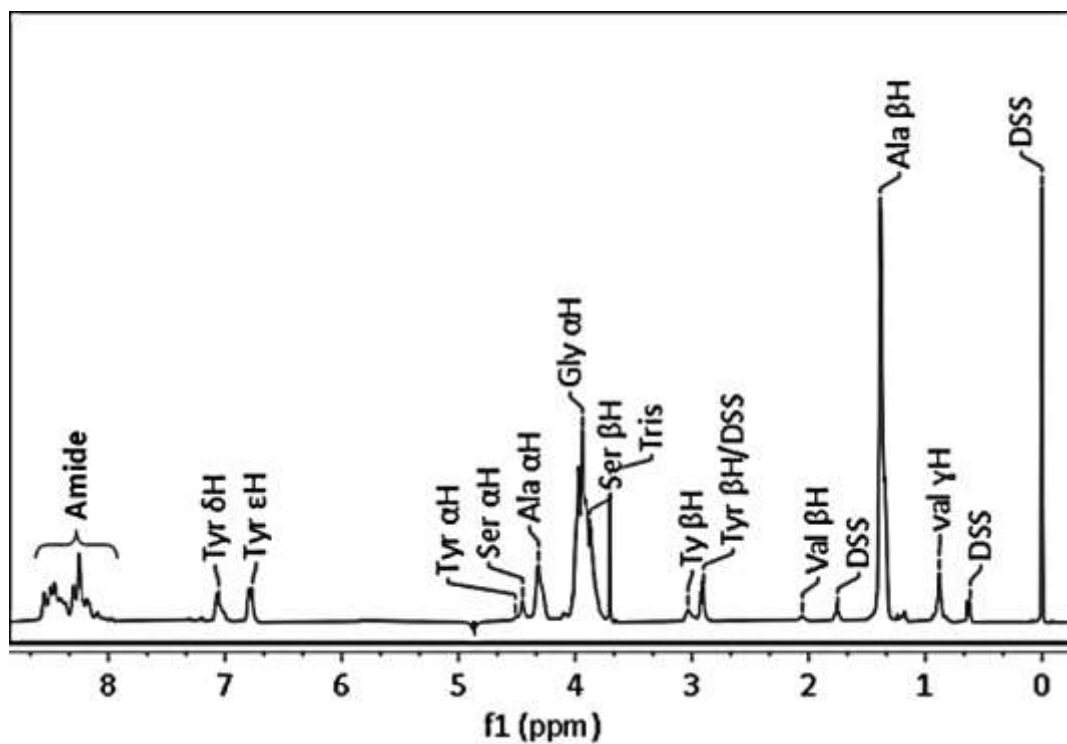

71

72 Figure S6.

73 One dimensional proton of fibroin. Simple proton spectra of partially deuterated NLSF with chemical shift  
 74 assignment ran using a Bruker Advance III 700 MHz instrument at pH 6 and referenced with DSS.



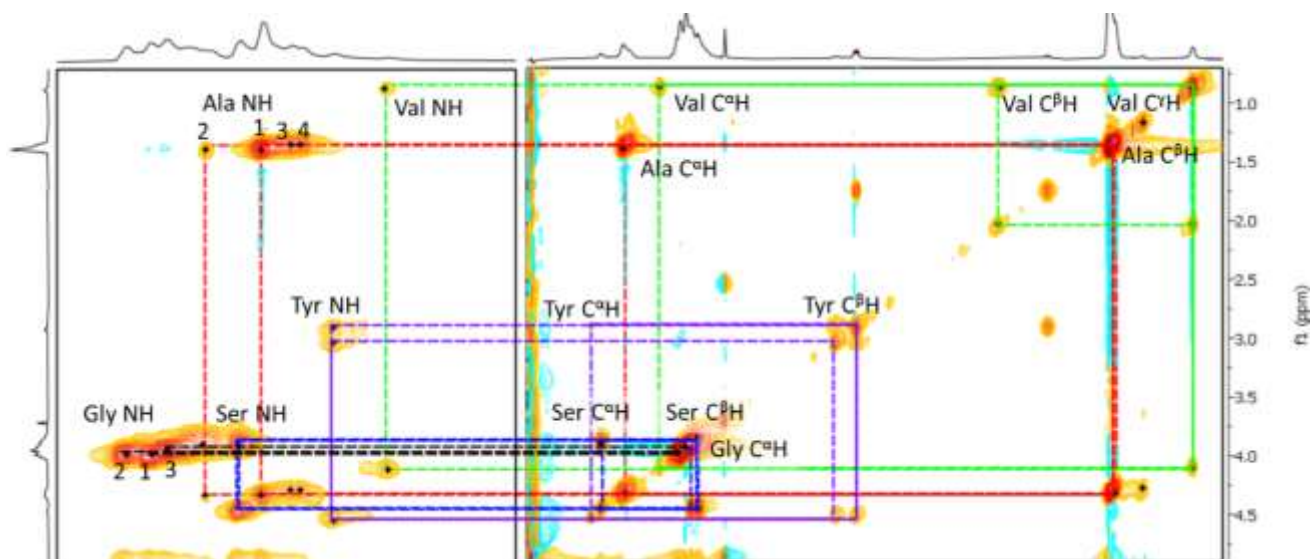

75

76 Figure S7.

77 Chemical shift assignment of proton. Homonuclear  $^1\text{H}$ - $^1\text{H}$  TOCSY experiment conducted using a Bruker  
 78 Advance III 700 MHz instrument at pH 6 and referenced with DSS of NLSF (5 mg/mL). Chemical shift  
 79 assignment is shown regarding the amino acid and coupling connections shown in coloured boxes/lines.  
 80 Boxes/lines are coloured by amino acid, with G, A, S, Y, and V is shown with black, red, blue, purple, and green  
 81 lines, respectively).



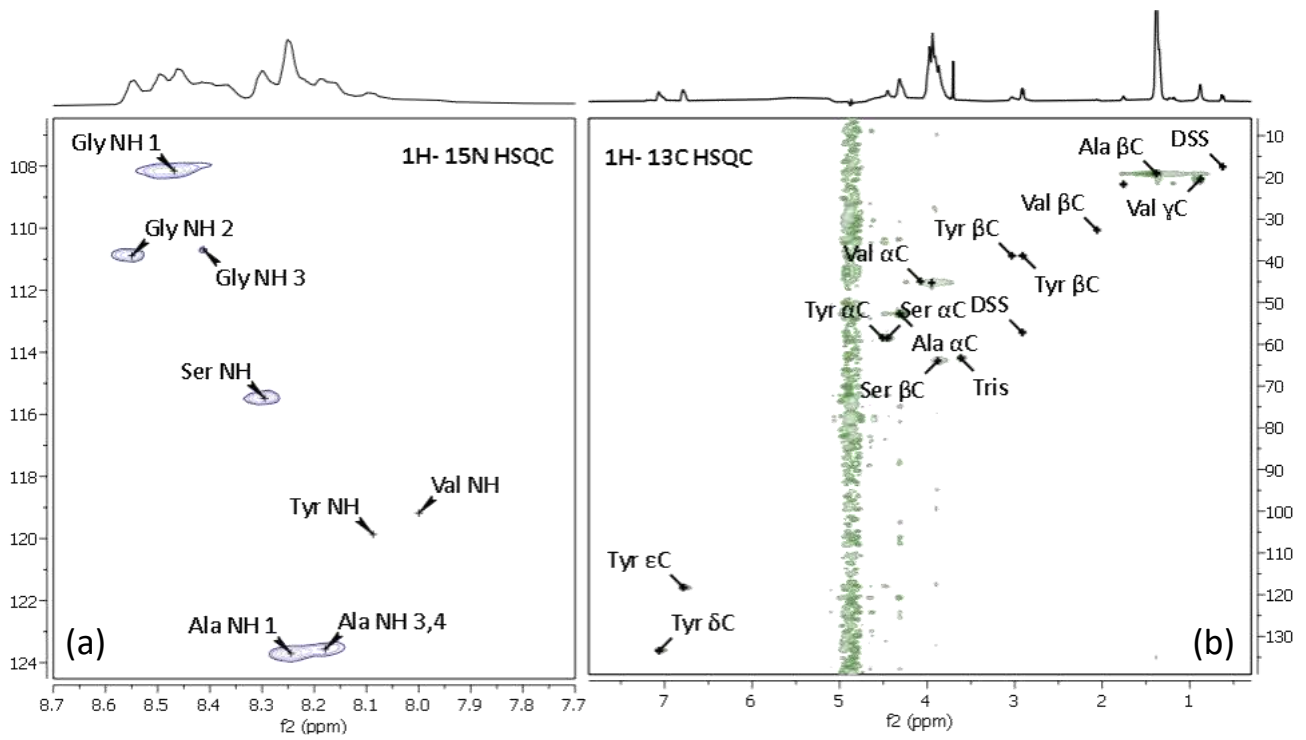

82

83 Figure S8.

84 NMR chemical shift residue assignment for NLSF. Heteronuclear  $^1\text{H}$ - $^{15}\text{N}$  HSQC (a, blue) and  $^1\text{H}$ - $^{13}\text{C}$  HSQC

85 (b, green) with their respective shift assignment.

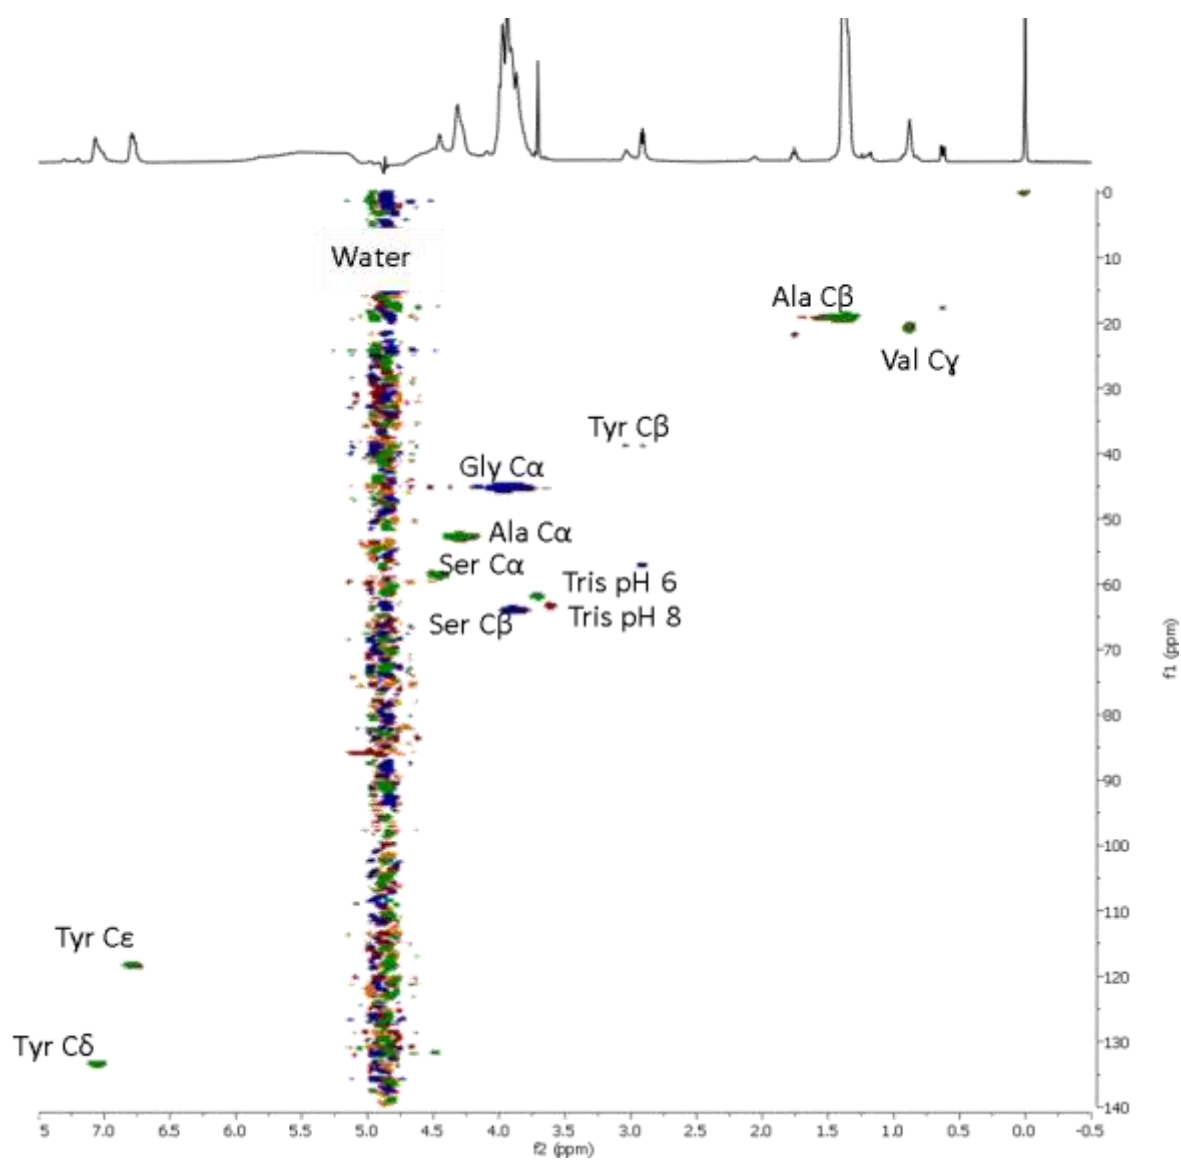

86

87 Figure S9.

88 Effect of pH on chemical shifts of NLSF. Superimposed  $^1\text{H}$ - $^{13}\text{C}$  HSQC spectra obtained for NLSF samples  
 89 buffered at pH 6 and 8, showing no change in the chemical environment of the detectable residues.

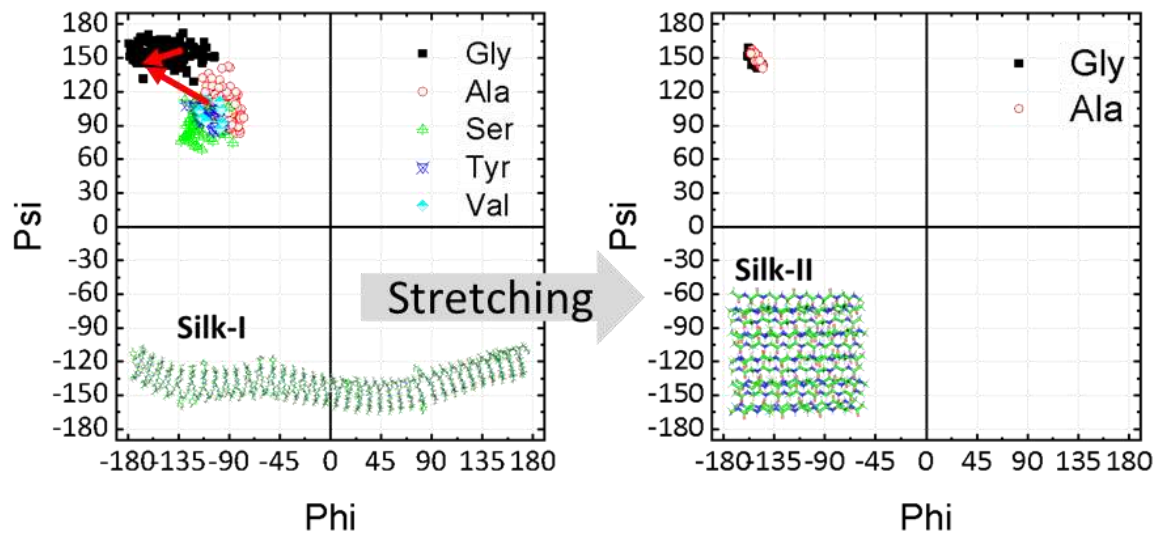

90

91 Figure S10.

92 Silk I to Silk II transformation, dihedral angles perspective. Proposed stretching induced transformation of the  
 93 proposed Silk-I to the theoretical Silk-II (DOI: 10.5452/ma-cs24y) as observed from dihedral angles.

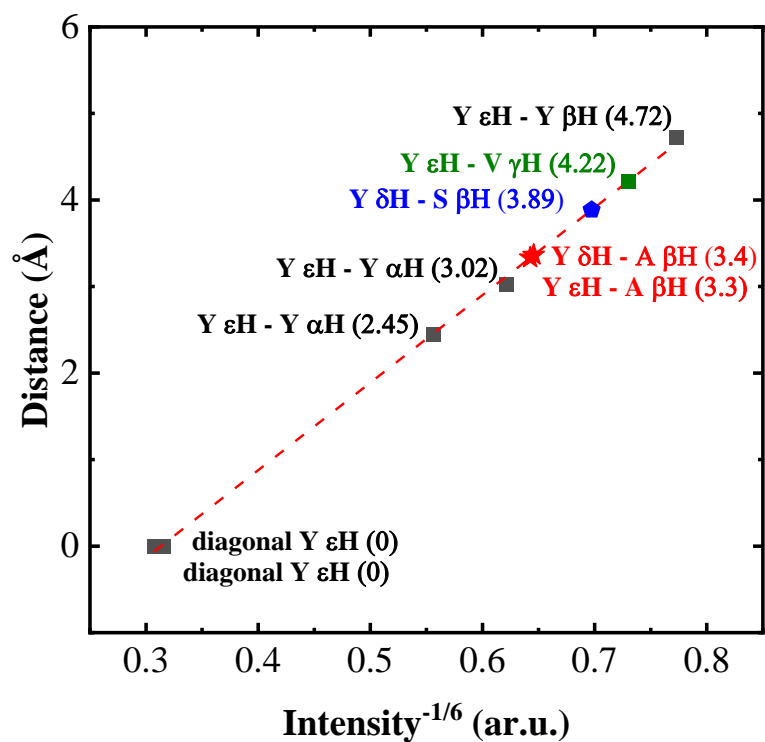

94

95 Figure S11.

96 Analysis and interpretation of NOESY data from NLSF. Distance against intensity<sup>-1/6</sup> for the assigned shifts  
 97 and sticks representation of a Y residue showing estimated intra-residue distances used as internal calibration  
 98 and estimated experimental values according to the internal calibration.

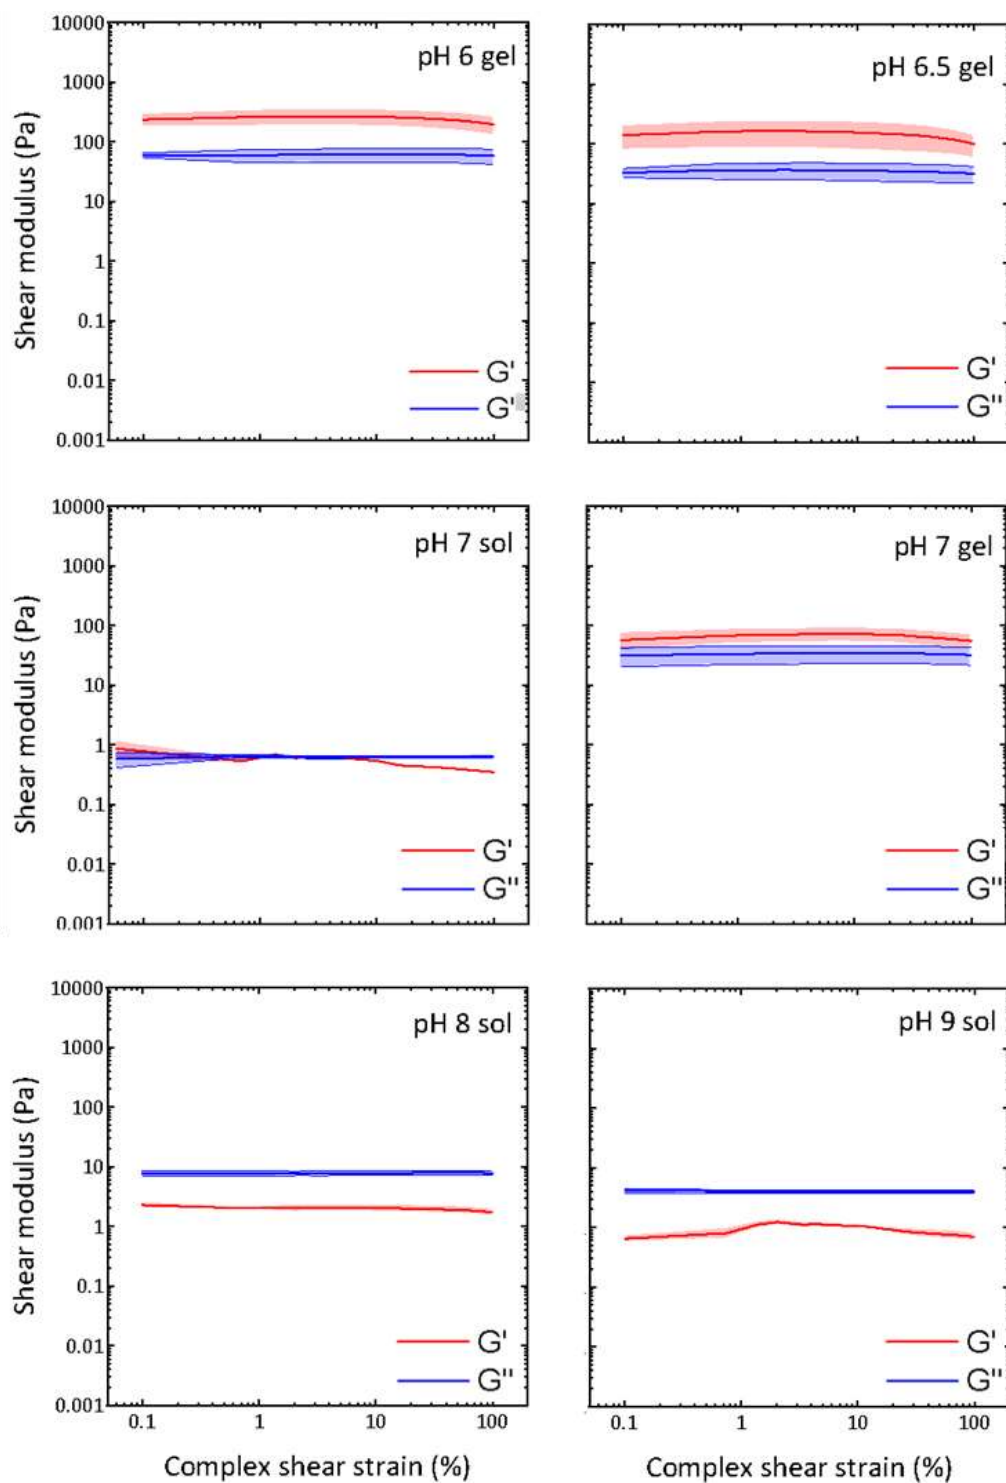

99

100 Figure S12.

101 Constant frequency rheology characterisation of NLSF. Shear rheology oscillatory experiment where the  
 102 complex strain was varied between 0.1 and 100 % at a constant frequency (1 Hz) for the samples of NLSF  
 103 buffered at different pH (indicated within the graphs). Curves are shown as averages of 5 replicates, with the  
 104 standard deviation shown as the shadowed area around the solid line. Experiments were intended to determine  
 105 the linear viscoelastic limit of the materials.

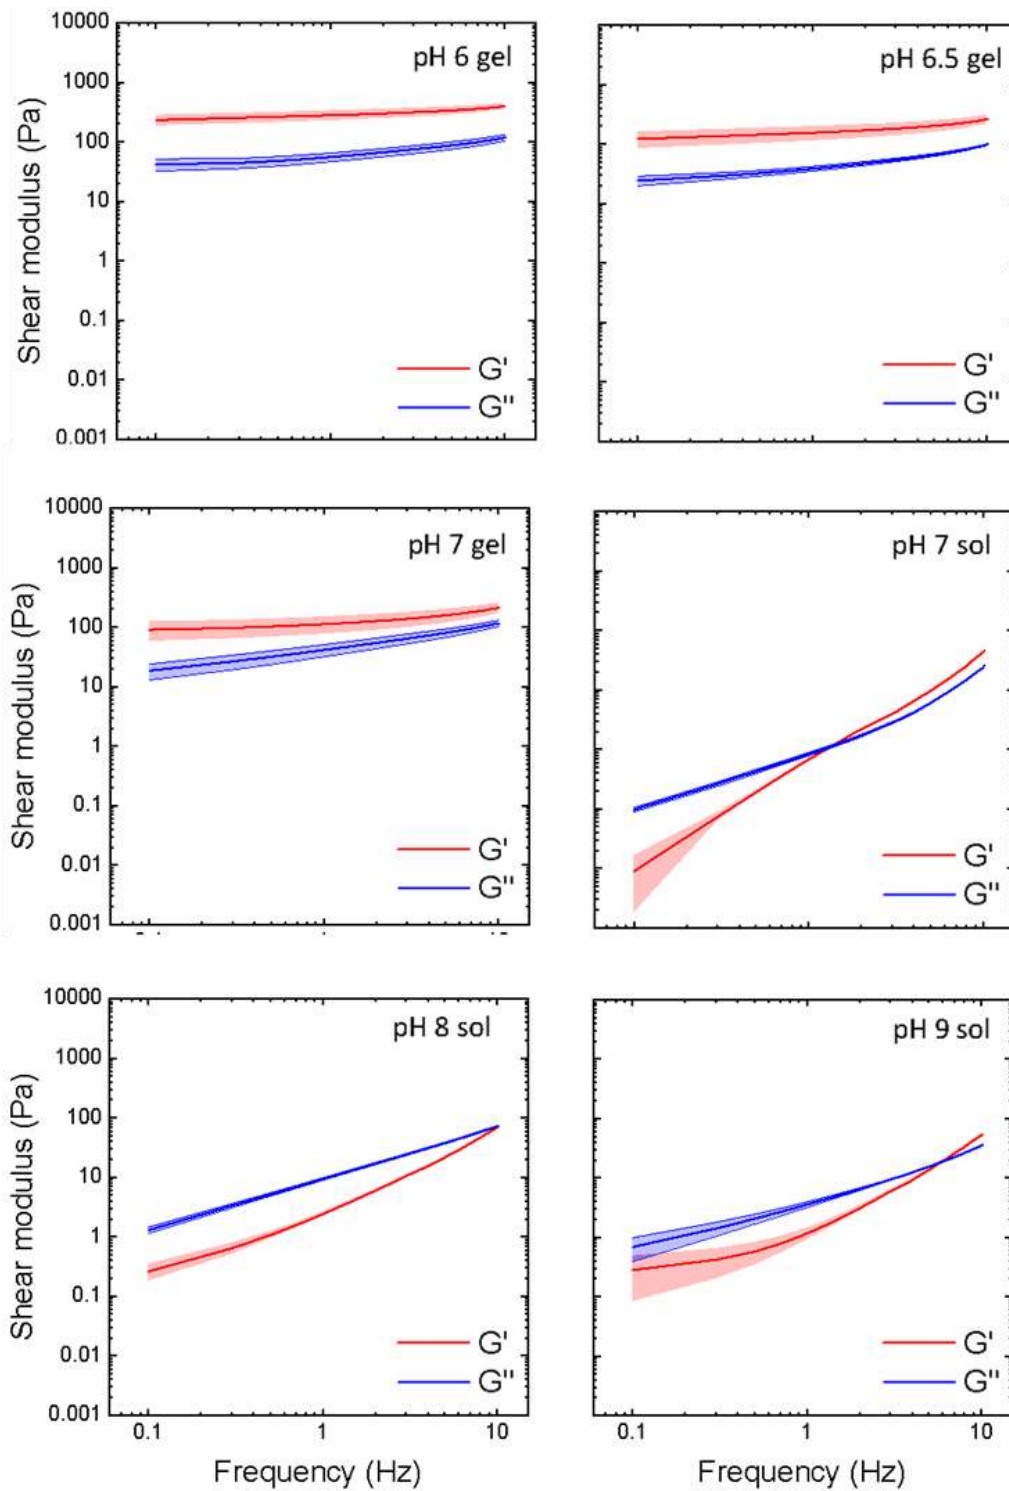

106

107 Figure S13.

108 Constant strain rheology characterisation of NLSF. Shear rheology oscillatory experiment where the frequency  
 109 was varied between 0.1 and 10 Hz at a constant strain (2 %) for the samples of NLSF buffered at different pH  
 110 (indicated within the graphs). Curves are shown as averages of 5 replicates, with the standard deviation shown  
 111 as the shadowed area around the solid line. Experiment shows the clear sol-gel transition suffered by the material  
 112 as the pH is lowered below 7.

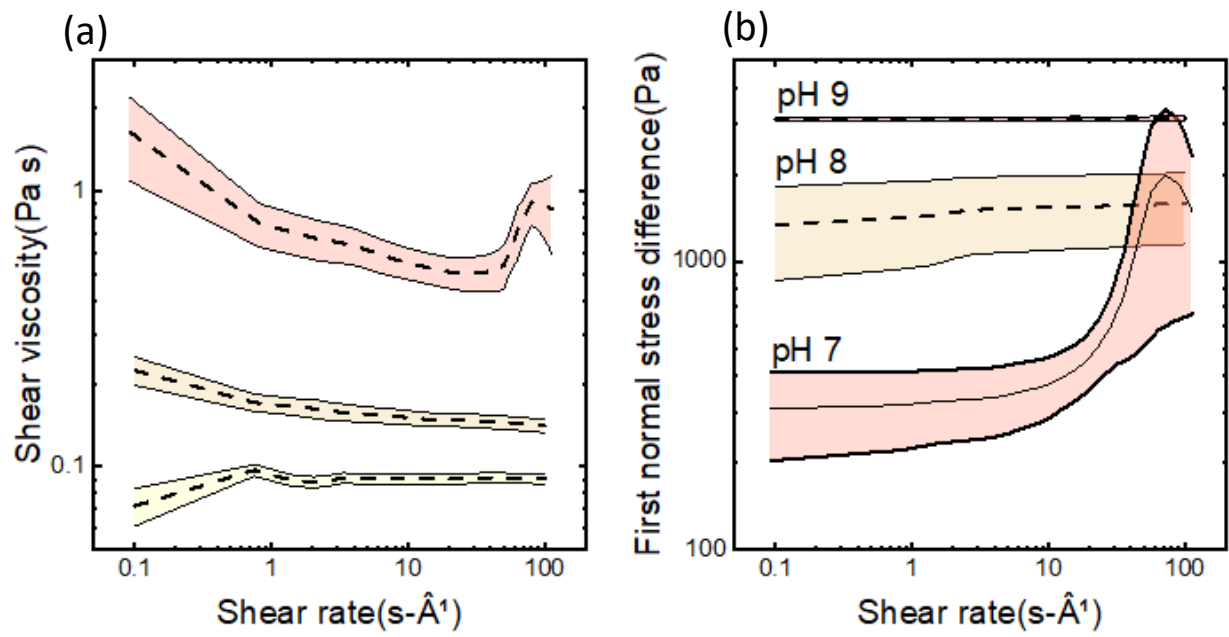

113

114 Figure S14.

115 Shear viscosity against shear rate for liquid samples of NLSF at different pH. Samples at pH (7, 8 and 9) and  
 116 (a) and first normal force difference vs shear rate of same samples (b). Curves showed averages (dashed black  
 117 lines) and standard deviation (shadowed area around average), technical replicates  $N = 5$ .



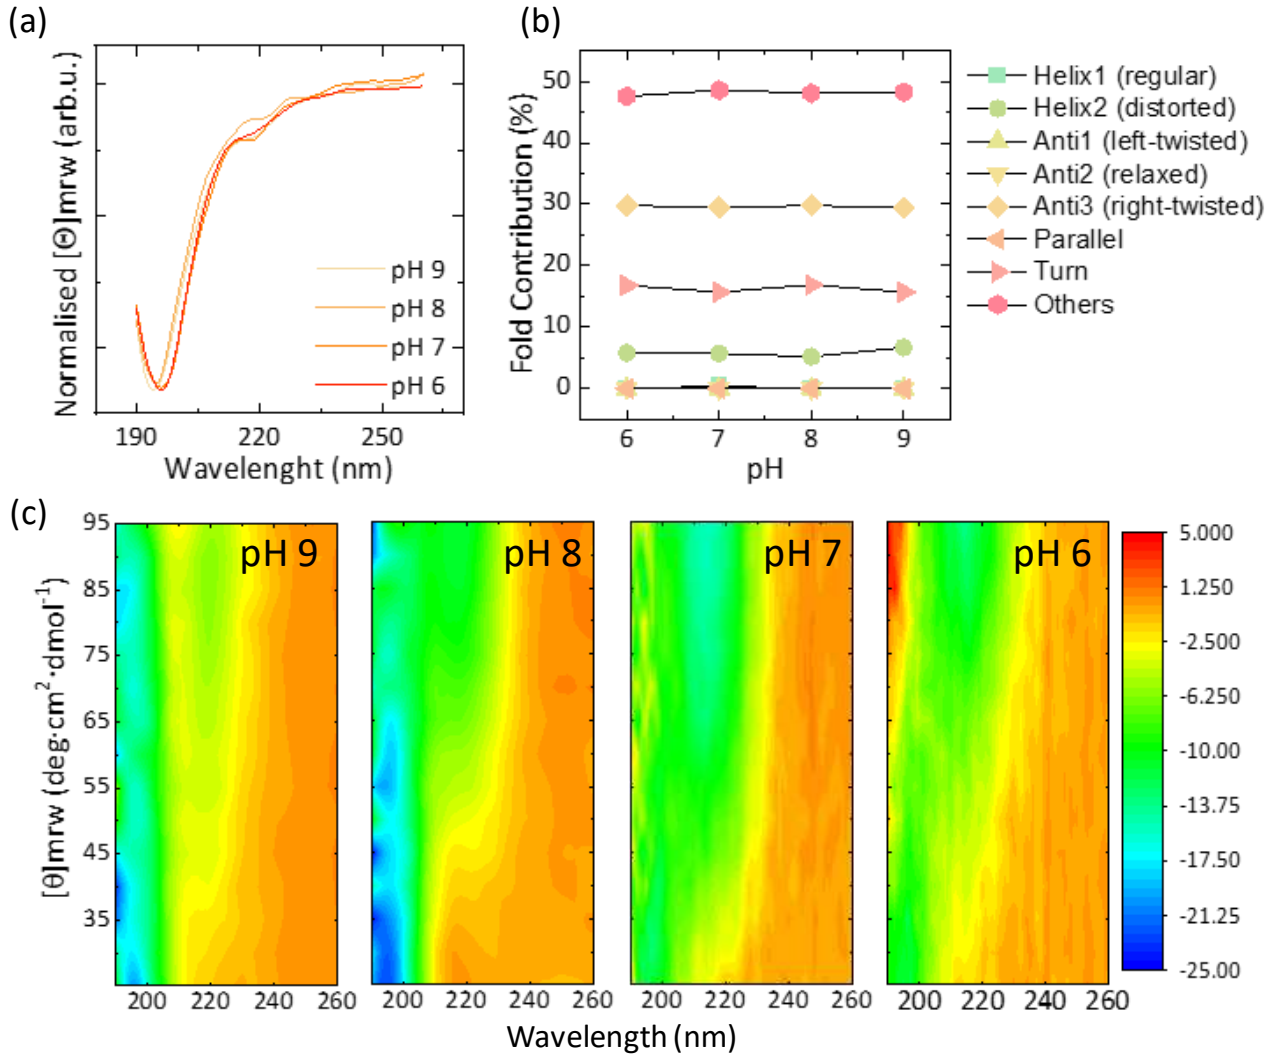

118

119 Figure S15.

120 Circular dichroism analysis of NLSF samples. Overlapped normalized Ellipticity values of the buffered samples  
 121 obtained by far-UV CD spectroscopy (a). Bestsel deconvolution of the curves showing estimated structural  
 122 contributions to the ellipticity signal (b). Series temperature scans of the buffered samples in the far-UV region,  
 123 where the vertical axis is the temperature, horizontal axis the wavelength, and the far-right the out-of-plane scale  
 124 with red being the maximum range and blue minimum (c).

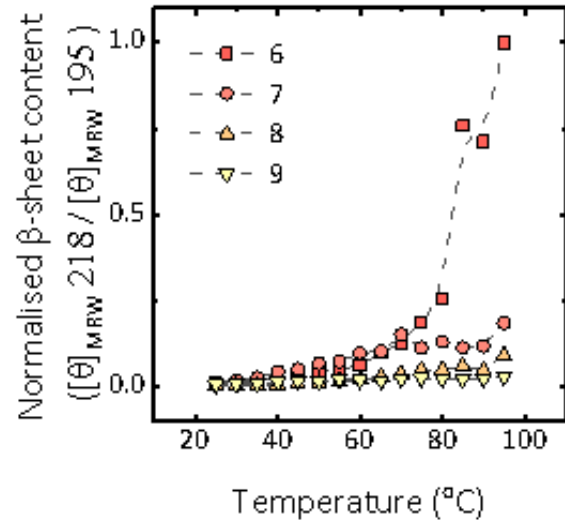

125

126 Figure S16.

127 Normalized  $\beta$ -sheet content as a function of temperature for all buffered samples (NLSF). The  $\beta$ -sheet content  
 128 was estimated as the ratio between the ellipticity at 218 and 195 nm, normalized against the maximum obtained  
 129 value for the data set.

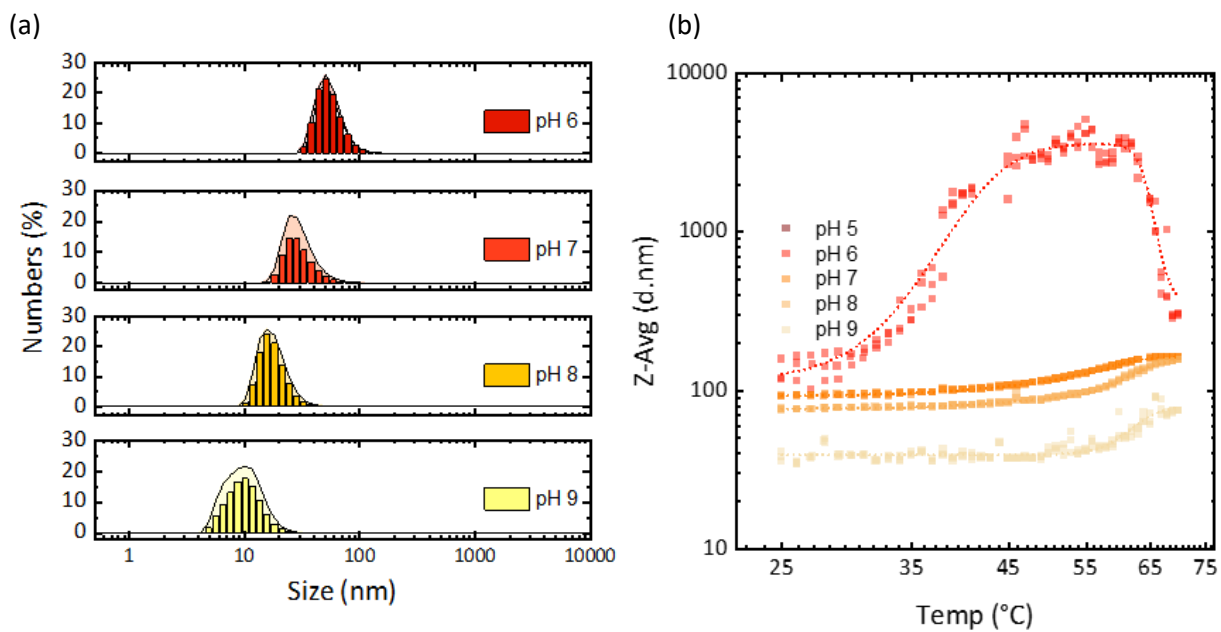

130

131 Figure S17.

132 Dynamic light scattering, DLS, analysis. DLS size distribution of NLSF obtained at different pH values plotted

133 as the Numbers (%) against the size in a linear vs log scale (a). Values of the Z-average size for the buffered

134 NLSF samples as a function of temperature (b). Values presented for technical replicates (N: 3).

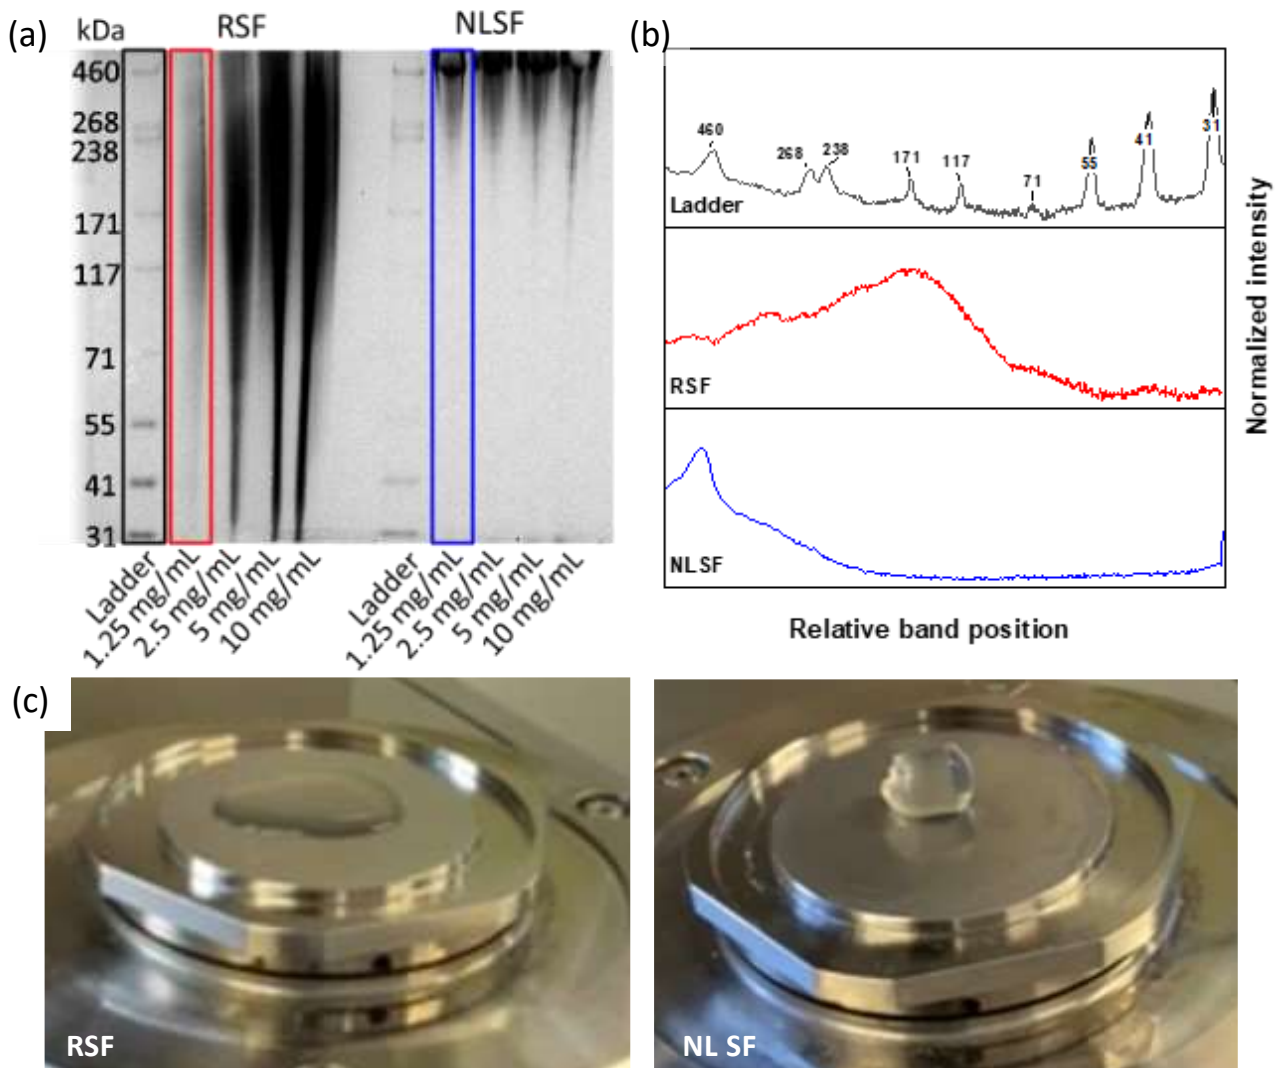

135

136 Figure S18.

137 Comparison of RSF and NLSF materials. Uncropped SDS-PAGE gel of RSF and NLSF at different protein  
 138 concentrations with reference ladder next to them (a). profiles extracted from the gels image from the selected  
 139 bands in rectangles (b). Photos of samples loaded onto a rheometer geometry of unbuffered RSF and NLSF  
 140 indicated (c).

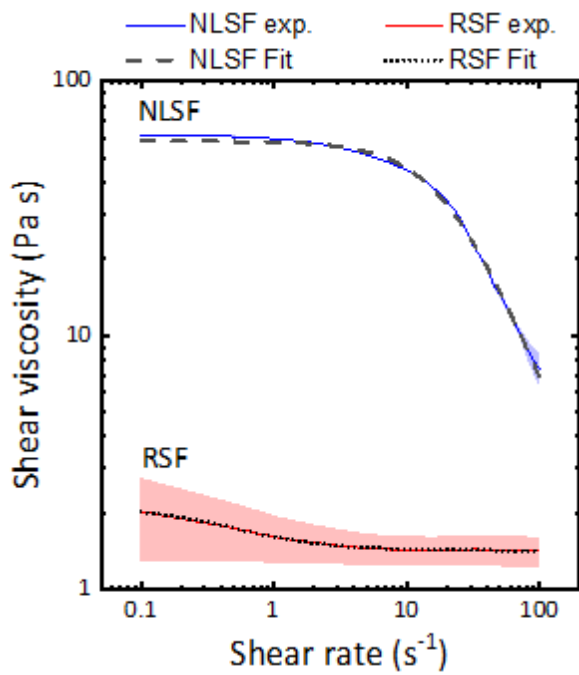

Cross fluid

$$\eta(\dot{\gamma}) = \eta_{\infty} + \frac{(\eta_0 - \eta_{\infty})}{1 + (\tau\dot{\gamma})^m}$$

|                 | NLSF             | RSF               |
|-----------------|------------------|-------------------|
| $\eta_0$        | $58.1 \pm 0.2$   | $2.13 \pm 0.02$   |
| $\eta_{\infty}$ | $0.9 \pm 0.3$    | $1.4255 \pm 6E-4$ |
| $\tau$          | $0.043 \pm 3E-4$ | $2.3 \pm 0.1$     |
| $m$             | $1.48 \pm 0.02$  | $1.18 \pm 0.03$   |

141

142 Figure S19.

143 Viscometry analysis of silk ion LiBr solutions. Flow curves obtained for NLSF and RSF in their LiBr solutions  
 144 plotted as shear viscosity against shear rate in a log-log scale. Solid lines represent averaged experimental data,  
 145 and dotted or dashed lines represent fits to a Cross fluid model, with constitutive equation shown on the right,  
 146 and the table below it shows the fitting parameters.

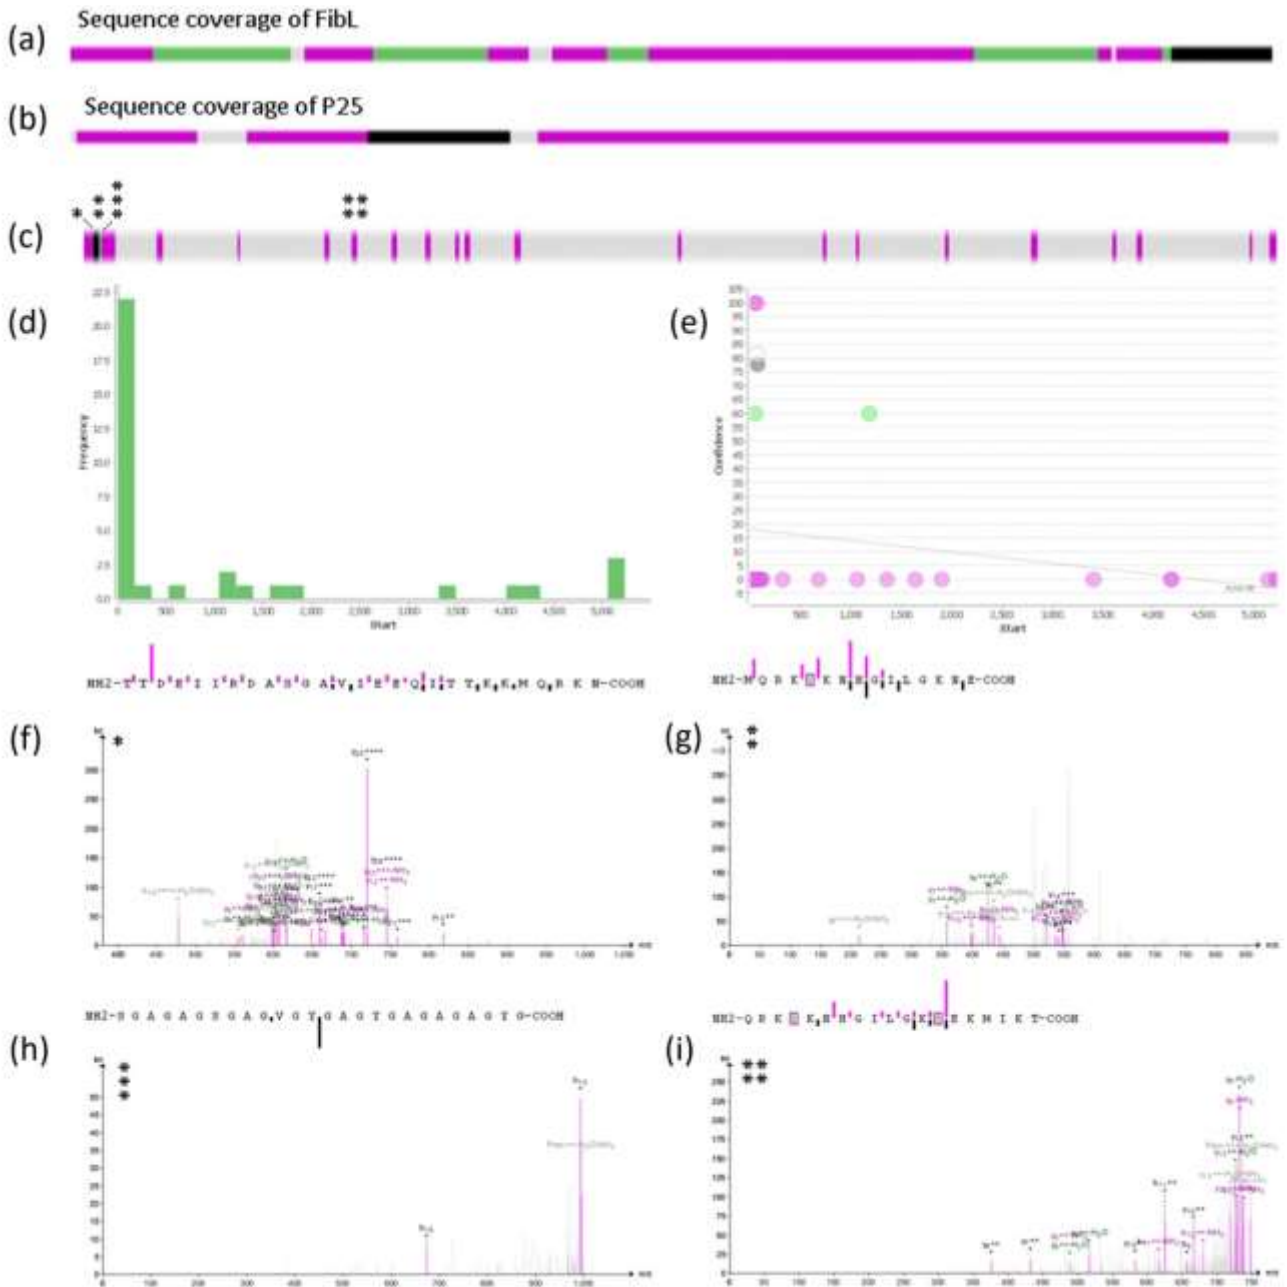

147

148 Figure S20.

149 Results from the proteomics analysis. Cartoons representing the sequence coverage of FibL (a) P25 (b) and

150 FibH (c). Plot representing the frequency distribution of peptides against residue position of the covered peptides

151 from FibH (d). Plot representing the confidence of found peptides against their residue position (e). Series of

152 example mass spectrograms obtained for the labelled peptides in FibH (f-i). Within the cartoons, the magenta

153 section represents low confidence assignments, and green and black represent high confidence assignments.

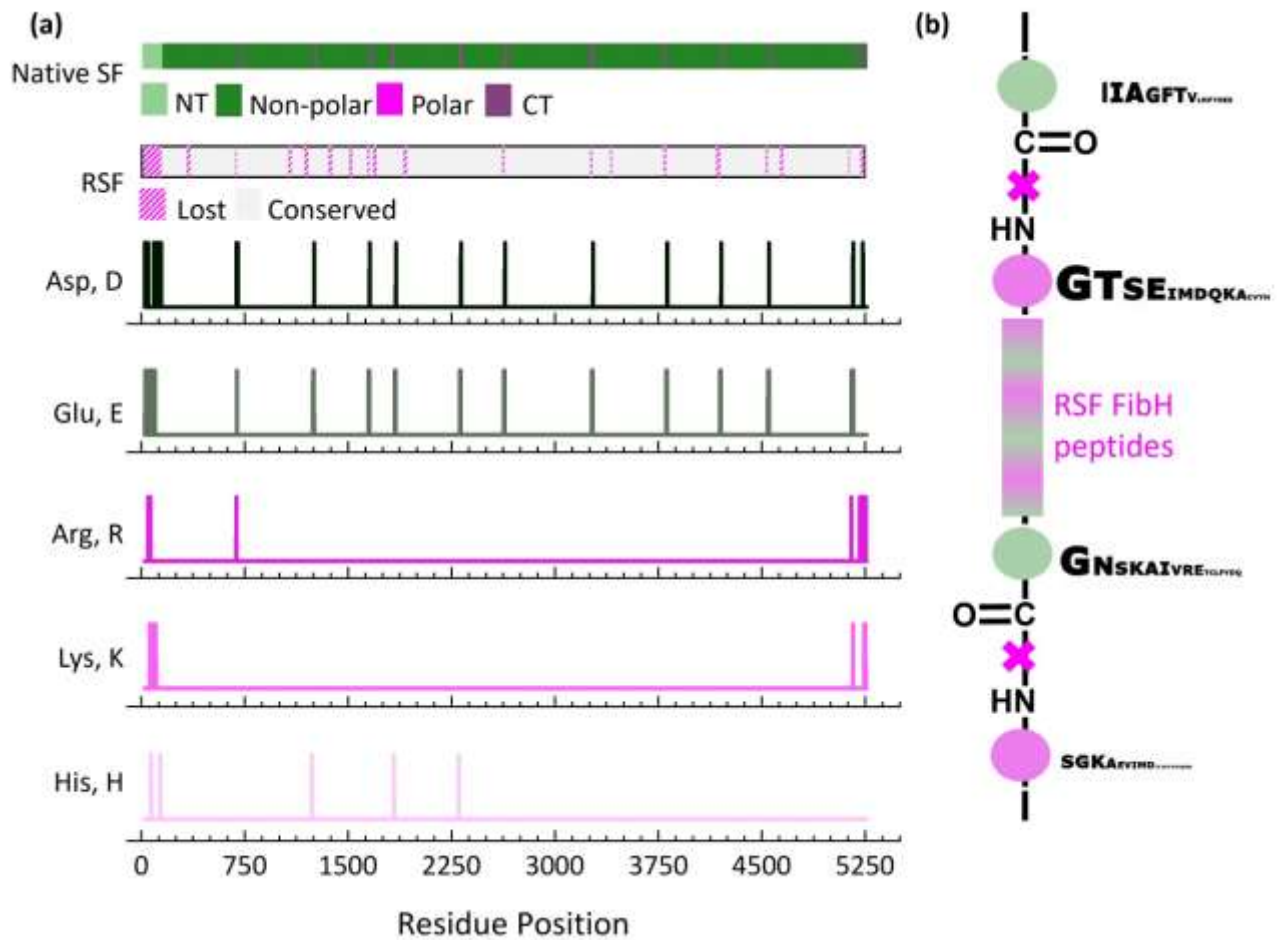

154

155 Figure S21.

156 Regeneration induced hydrolysis on fibroin. Carton showing the multidomain architecture of the primary  
 157 structure of FibH (top), followed by an aligned cartoon representing the total sequence coverage from the  
 158 hydrolysate peptides recovered from RSF. Below, different plots show several indicated residues' positions  
 159 along the sequence of FibH (a). Scheme representing the recovered peptides from RSF, with logo  
 160 representations of the observed residues at terminal positions of the detected peptides, and those expected from  
 161 the retained chains (b)



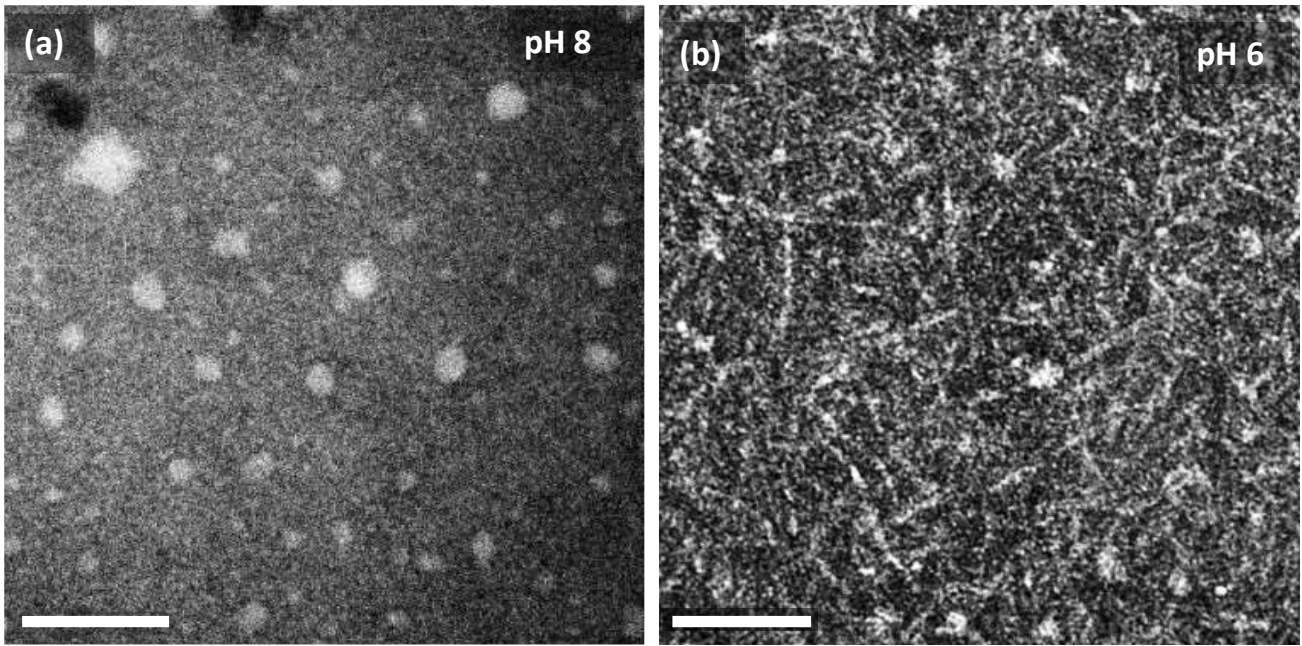

162

163

164

165

166

Figure S22.

TEM analysis of morphological changes in silk fibroin (NLSF). Negatively stained TEM images of globular units observed at pH 8 (a), and elongated fibrillar structures observed at pH 6 (b). Scale bars represent 100 nm in both cases.

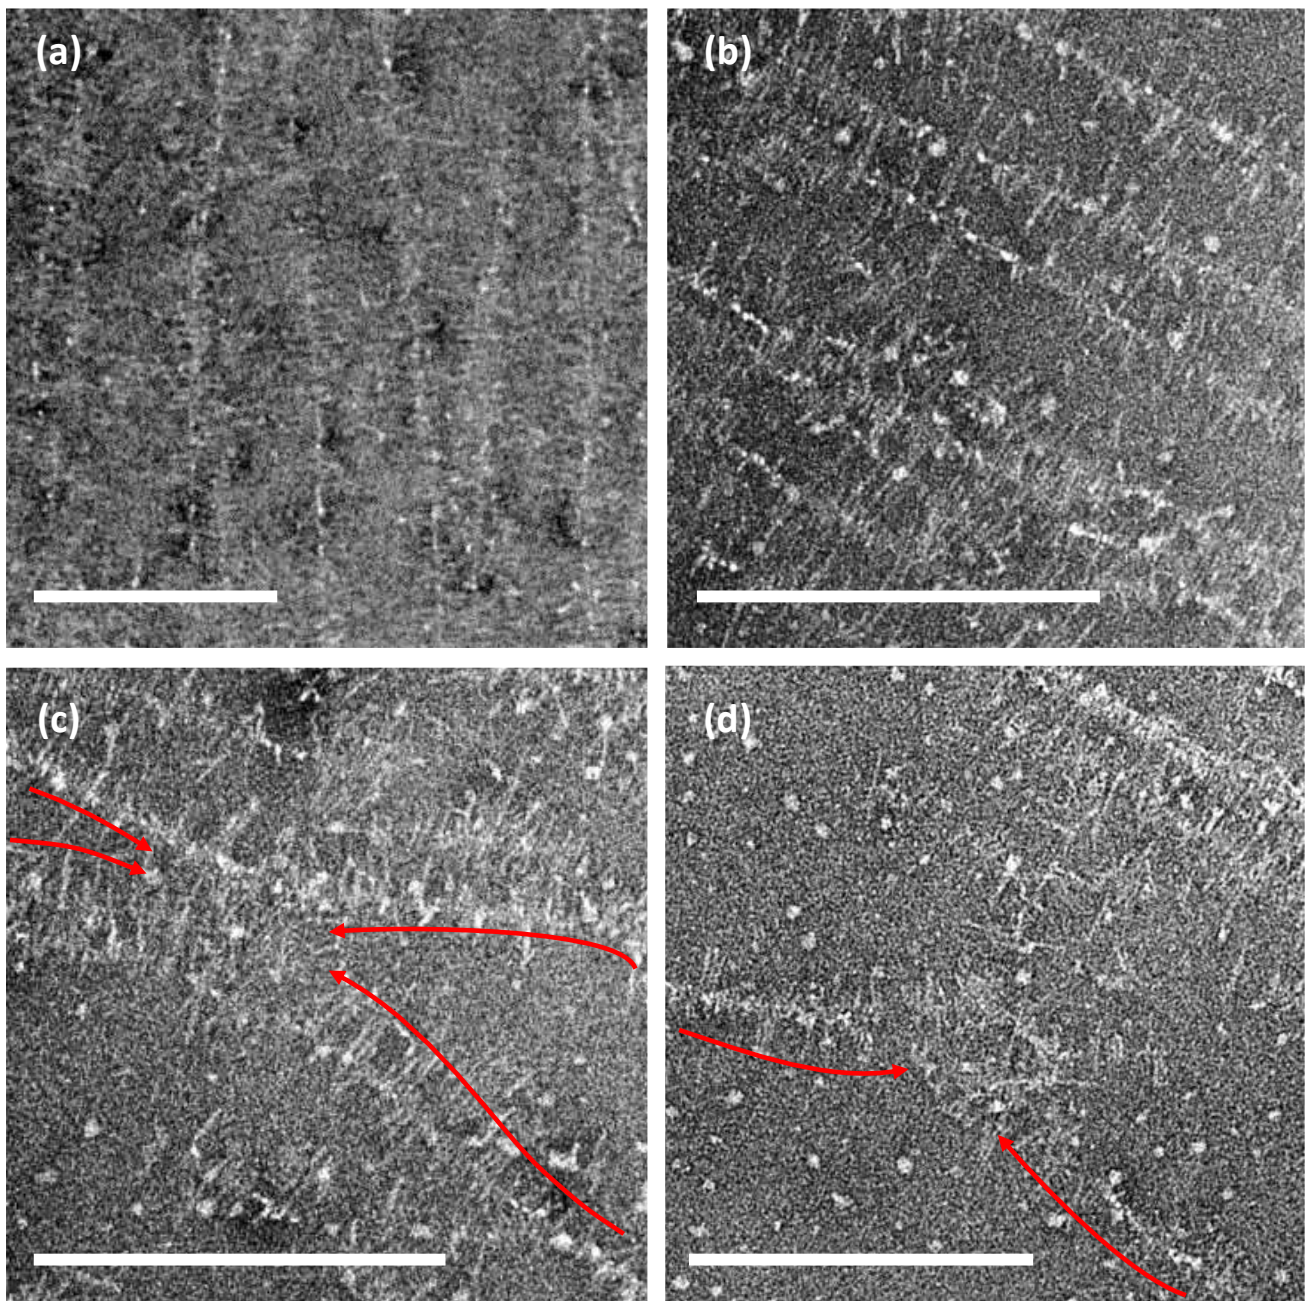

167

168 Figure S23.

169 TEM analysis of supramoleculr assemblies obtained for NLSF. Negatively stained TEM images of intact  
170 supramolecular brush-like fibres (a, b) and illustrative images showing possible lateral interactions (c) and  
171 breakage of the structure (d), with arrows added as guides. Scale bars are 500 nm in (a-d).

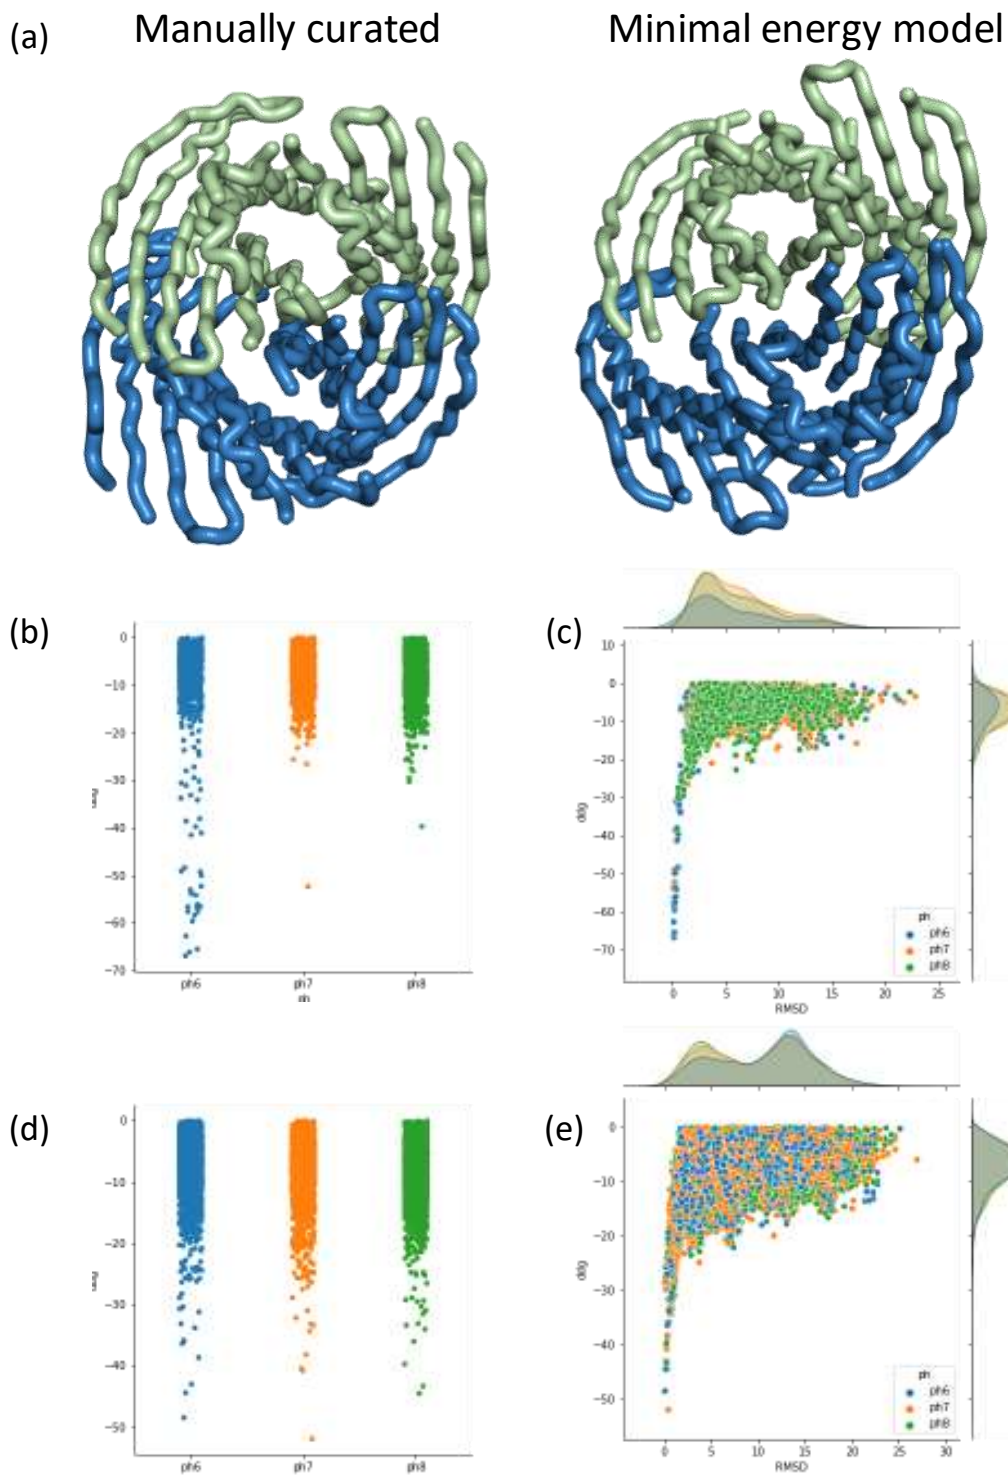

172  
173

Figure S24.

174 N-terminal domain oligomerisation. (a) Ribbons representation of two stacked tetrameric units showing the  
175 manually curated model (left) and the equivalent relaxed and docked minimal energy model (right) as observed  
176 from the top (top). (b) Estimated Rosetta binding free energies of docking simulations against pH for the n4/n4  
177 interface. (c) Estimated Rosetta binding free energies of docking simulations against residue median standard  
178 deviation (RMSD) of the different simulations with the manually curated and relaxed model as reference for the  
179 n4/n4 interface. (d) Estimated Rosetta binding free energies of docking simulations against pH for the n2/n2  
180 interface. (e) Estimated Rosetta binding free energies of docking simulations against residue median standard  
181 deviation (RMSD) of the different simulations with the manually curated and relaxed model as reference for the  
182 n2/n2 interface.

183



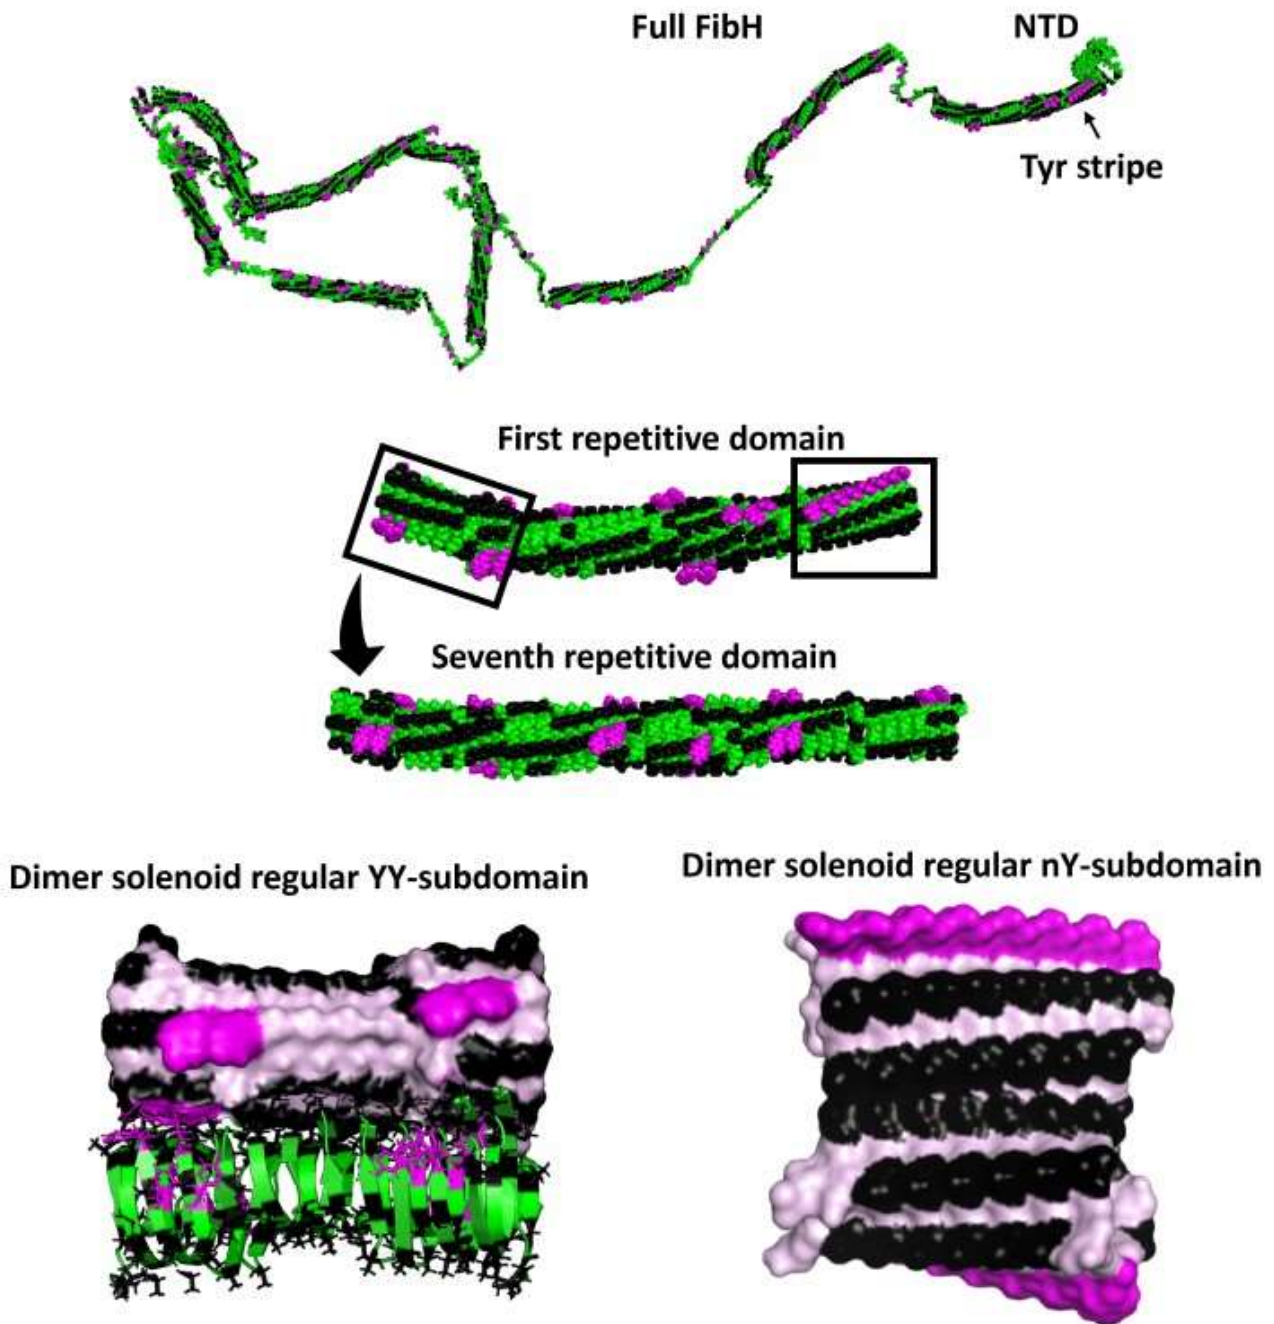

184

185 Figure S25.

186 The role of topology and Ala residues in driving lateral interactions. Complete proposed FibH surface model  
 187 coloured to highlight Ala (black), Y (magenta) and Val (black) from all other residues (green or light pink)  
 188 shown at the top. At the centre of the composite image, the detail of the first and sixth repetitive domain is  
 189 shown, highlighting the detected subdomains and the difference in the spatial distribution of Y residues. At the  
 190 bottom, two laterally docked models of the two different subdomains, showing binding at Ala interfaces with  
 191 avoidance of Y residues; colour wheat or green represent all other residue but Ala and Y.

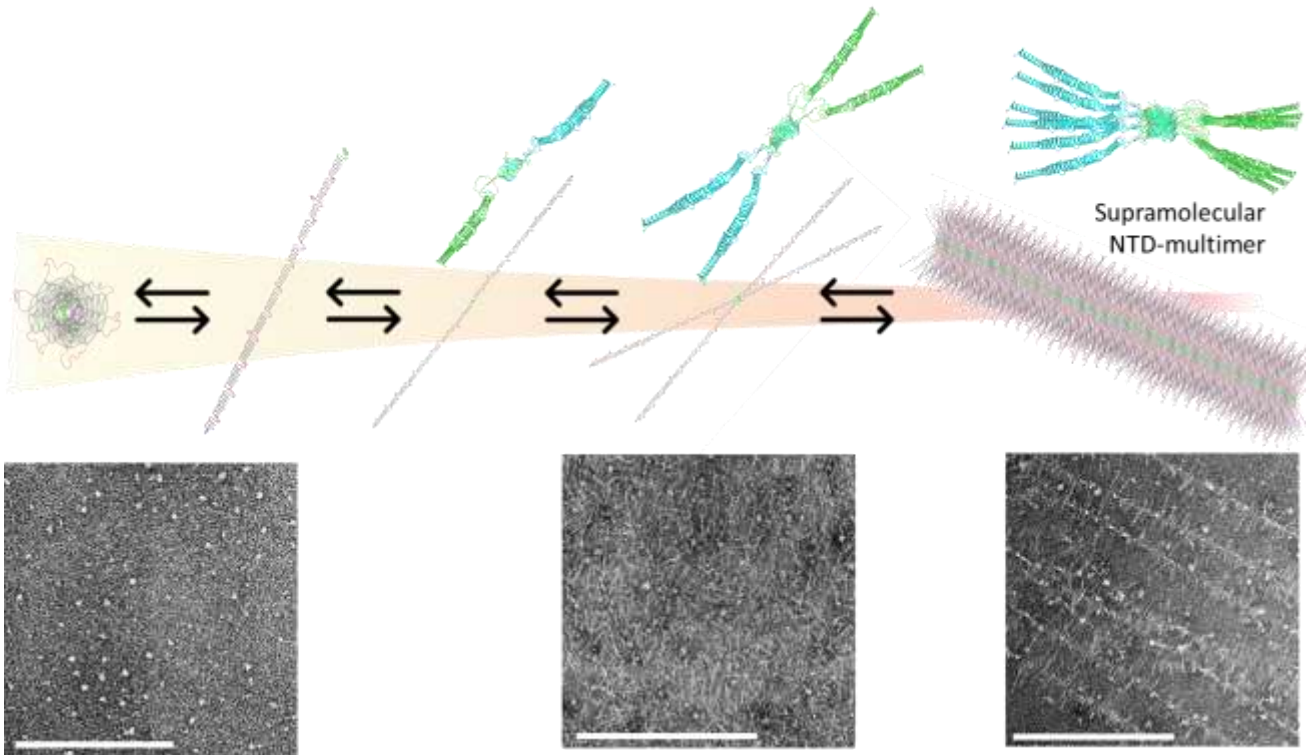

192

193 Figure S26.

194 Proposed NTD-driven self-assembly process: FibH, as a multidomain solenoidal molecule exists, takes a  
 195 globular appearance with a diameter of about 20 nm at pH values above 7. At pH 7, the linkers are partially  
 196 protonated, and the protein can extend and start participating in lower-order oligomer species. As pH continues  
 197 to drop, assembly continues into the supramolecular bottlebrush fibres. PDB models represent only the NTD  
 198 with the first repetitive domain, whereas drawings represent, schematically, the complete molecule. The  
 199 background image's colour and shape allude to the pH gradient (from 8 to 6) and the anterior section of the silk  
 200 gland (ASG), respectively. Negatively stained TEM images shown below are intended to show snapshots of the  
 201 assembly process, and scale bars represent 500 nm.

202

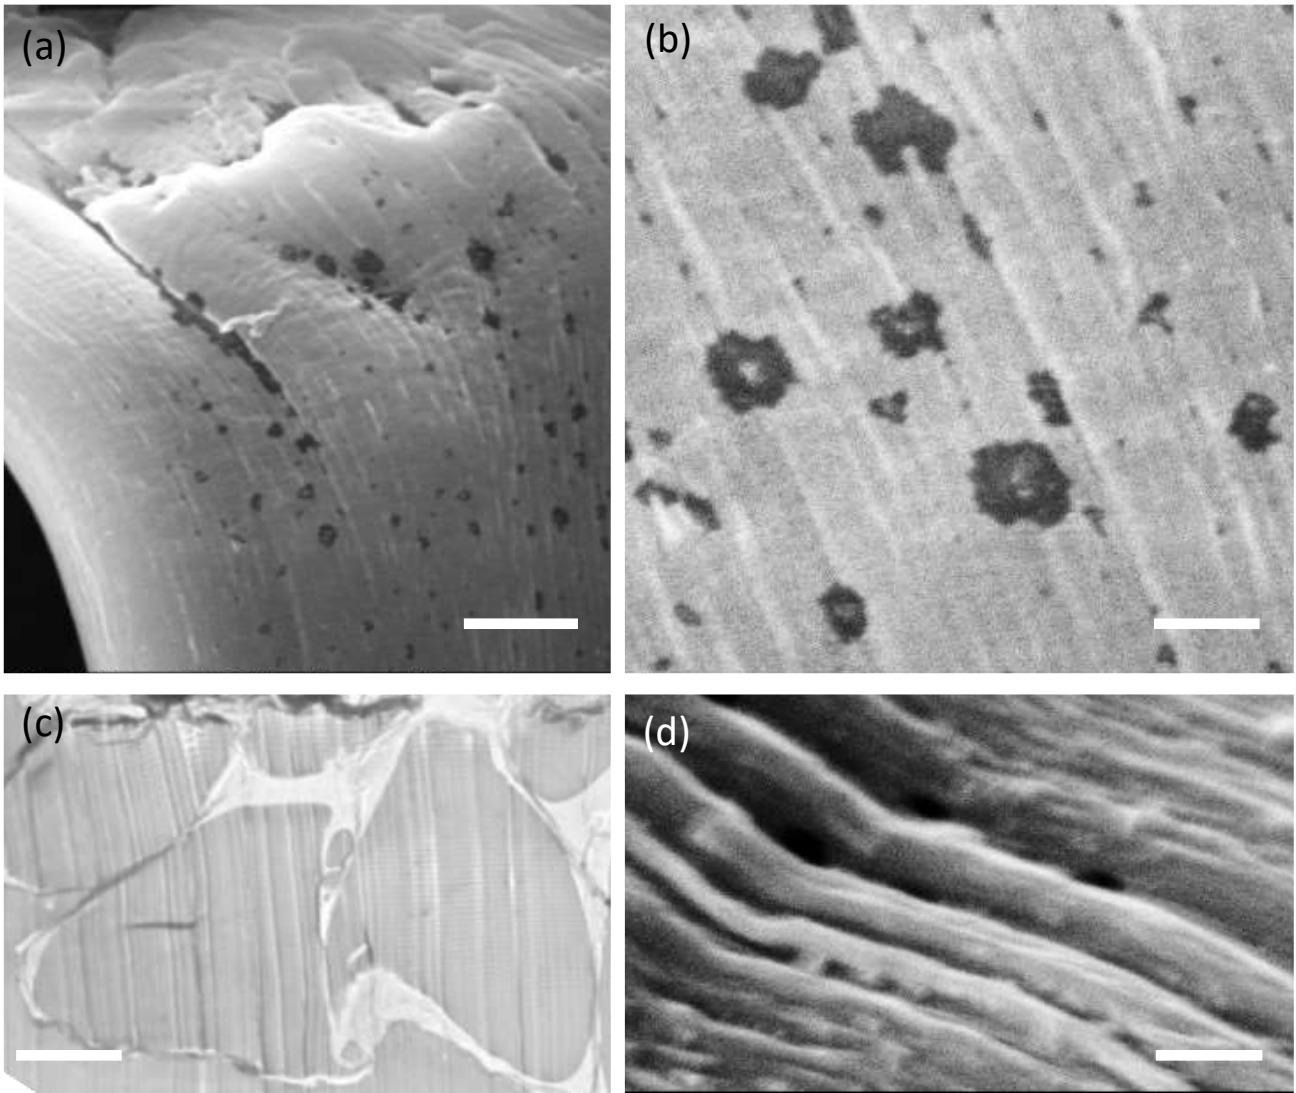

203

204 Figure S27.

205 Microscopy analysis of natural silk fibre. SED-SEM image of a sheared degummed fibre (a). SEM detail off  
206 the same fibre showing nanofibrillar texture and void formation during shearing (b). TEM image of a  
207 microtomed section of an embedded raw fibre showing twin fibroin fibres coated by a less electron-dense sericin  
208 layer (c). SEM image showing further detail of the nanofibrillar texture on a tilted specimen (D). Scale bars are  
209 2  $\mu\text{m}$  in (a) and 500 nm (b-d).

210

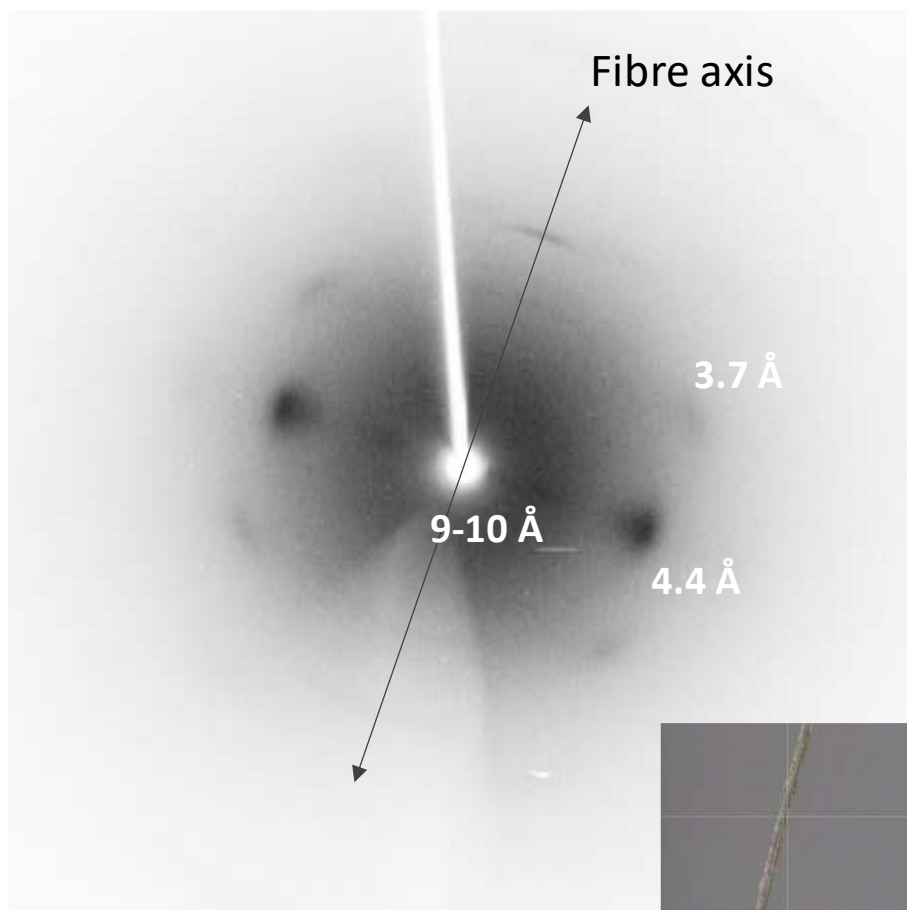

211

212 Figure S28.

213 Fibre X-ray diffraction of natural silk fibre. 2D X-ray diffraction pattern of a raw silk fibroin fibre with assigned

214 distances.



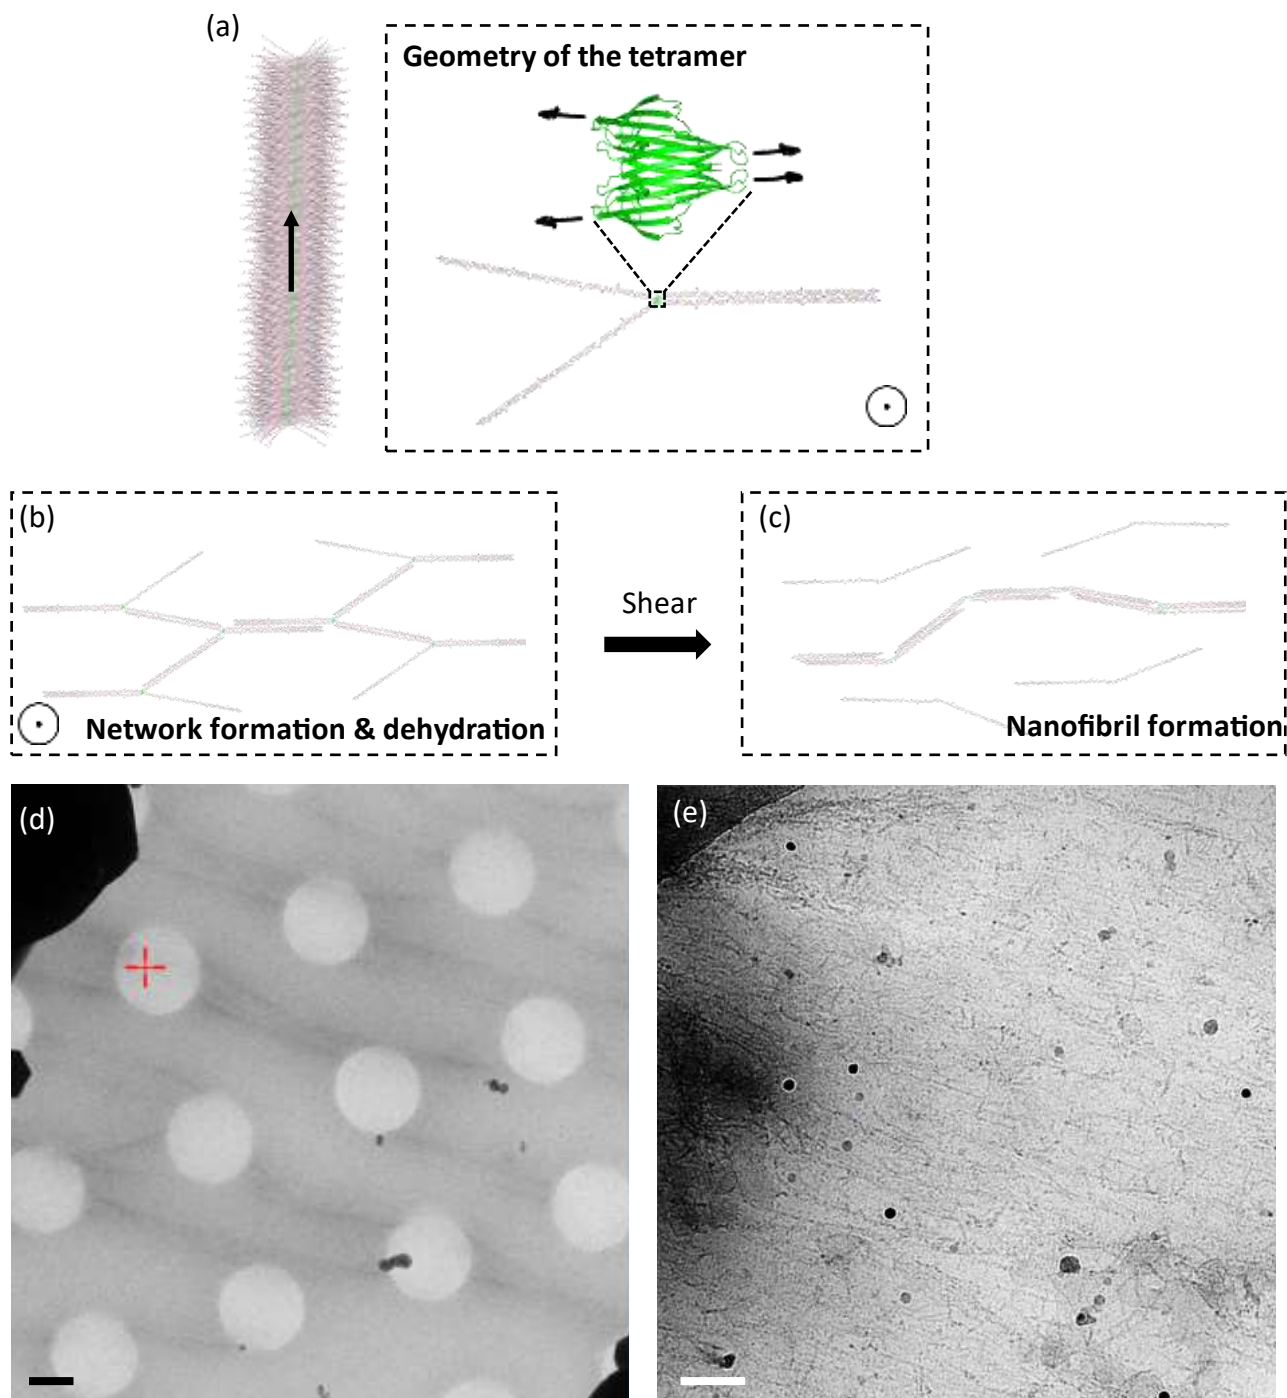

215

216 Figure S29.

217 Proposed network formation is driven by lateral interaction of solenoid units: Structure of a tetrameric unit  
 218 within the supramolecular complex, showing the direction towards c-termini where the first repetitive domain  
 219 would be located and the possible initiation intra-unit lateral interactions (a). Network of supramolecular fibres  
 220 stabilized by lateral interactions of solenoids (b). Breakage of the NTD interactions and transformation to a  
 221 flow-aligned solenoid network formation (c). Cryo-TEM image obtained from an apparent proto fibre at low  
 222 magnification from NLSF (d), and at high magnification (e), showing what is believed to be evidence of the  
 223 pre-extended solenoid network (NLSF) (e). Scale bar 1  $\mu\text{m}$  in (d) and 100 nm in (e).

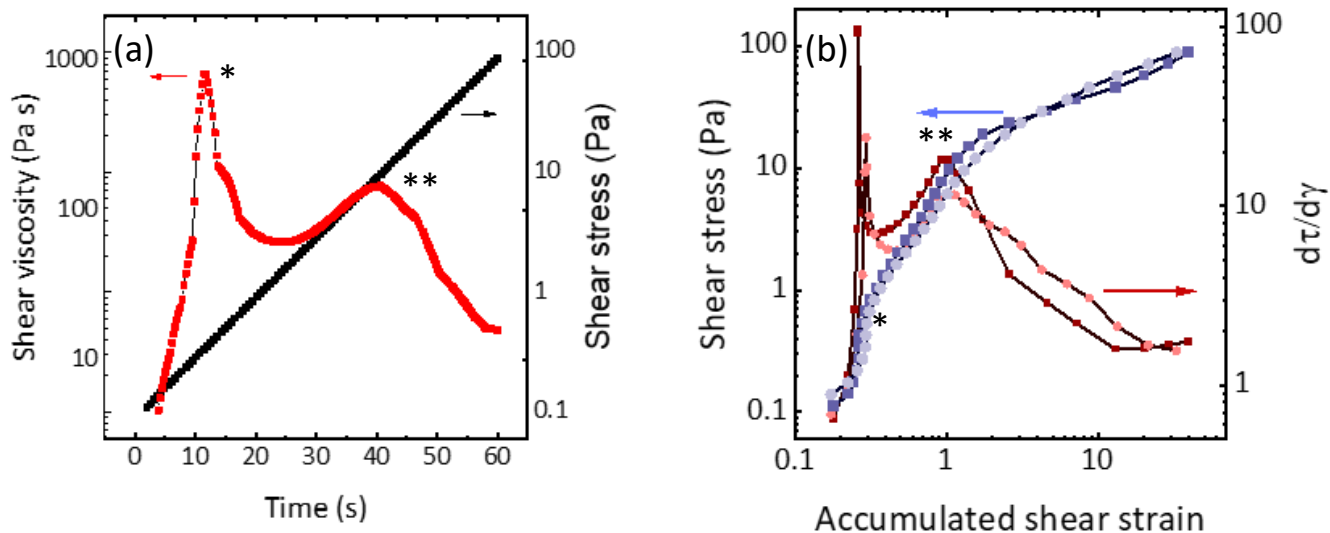

224

225 Figure S30.

226 Evidence of two yield stresses. Shear yield stress experiments conducted on a pH 7 viscoelastic sample: Shear  
 227 viscosity and shear stress against time in a log-linear scale, showing two yield points shown as maxima in  
 228 viscosity (a). Shear stress and its derivative against accumulated shear strain for two independent samples  
 229 showing a first sharp and a second broad yield (b).

230 Table S1. Different literature unit cell parameters for Silk I structures derived from X-ray diffraction.

*Unit cell parameters*

| a     | b     | c     | $\alpha$ | $\beta$ | $\gamma$ | reference                         | Year | Molecular Feature      |
|-------|-------|-------|----------|---------|----------|-----------------------------------|------|------------------------|
| 4.59  | 7.20  | 9.08  | 90       | 90      | 90       | Konishi & Kurokawa <sup>43</sup>  | 1968 | Helical folded strands |
| 4.72  | 14.4  | 9.4   | 90       | 90      | 90       | Lotz & Keith <sup>30</sup>        | 1971 | Crankshaft model*      |
| 4.65  | 14.24 | 8.88  | 90       | 90      | 90       | Okuyama et al. <sup>31</sup>      | 1988 | Crankshaft-like*       |
| 4.79  | 4.79  | 22.2  | 90       | 90      | 120      | Muñoz-Guerra et al. <sup>44</sup> | 1988 | Almost extended strand |
| 8.94  | 6.46  | 11.26 | 90       | 90      | 90       | Fossey et al. <sup>45</sup>       | 1991 | Almost extended strand |
| 22.66 | 5.70  | 20.82 | 90       | 90      | 90       | He et al. <sup>28</sup>           | 1999 | Almost extended strand |

231 \*Model used to derive the type-II  $\beta$ -turn model.

232 Table S2.

233 Reflections obtained from the oriented film diffraction pattern show typical Silk-I spacing.

| Experimental results |           |                |           |
|----------------------|-----------|----------------|-----------|
| Equatorial           |           | Meridional     |           |
| d-Spacings (Å)       | Intensity | d-Spacings (Å) | Intensity |
| 7.35                 | 226       | 5.21           | 169       |
| 5.12                 | 132       | 3.50           | 111       |
| 3.70                 | 170       | 3.15           | 104       |
| 2.56                 | 62        | 2.04           | 42        |
| 2.06                 | 33        |                |           |

234

235 Table S3.

236 NMR chemical shifts. Assigned chemical shifts for simplified motifs compared to those found in the literature  
 237 <sup>22</sup>.

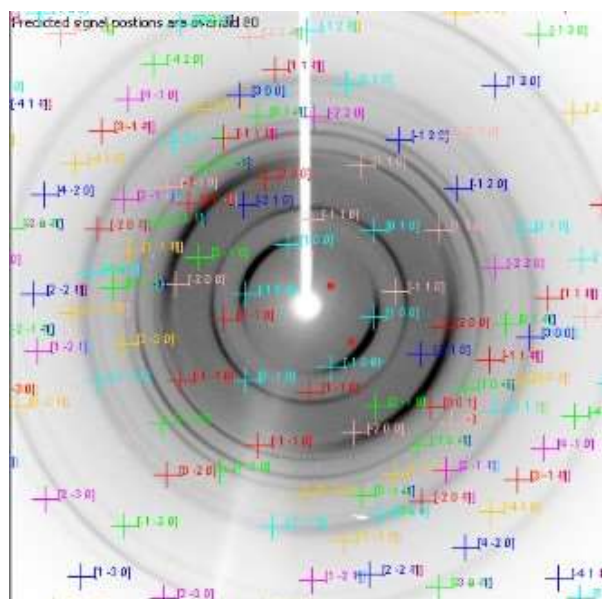

| <u>h</u> | <u>k</u> | <u>l</u> | <u>d-spacing</u> |
|----------|----------|----------|------------------|
| -5       | 1        | 0        | 1.754            |
| -5       | 2        | 0        | 1.788            |
| -4       | 0        | -1       | 1.691            |
| -4       | 0        | 0        | 1.949            |
| -4       | 0        | 1        | 1.691            |
| -4       | 1        | -1       | 1.863            |
| -4       | 1        | 0        | 2.227            |
| -4       | 1        | 1        | 1.863            |
| -4       | 2        | -1       | 1.824            |
| -4       | 2        | 0        | 2.162            |
| -4       | 2        | 1        | 1.824            |
| -4       | 3        | 0        | 1.824            |
| -3       | -1       | -1       | 1.701            |
| -3       | -1       | 0        | 1.964            |
| -3       | -1       | 1        | 1.701            |
| -3       | 0        | -1       | 2.064            |
| -3       | 0        | 0        | 2.598            |
| -3       | 0        | 1        | 2.064            |
| -3       | 1        | -1       | 2.25             |
| -3       | 1        | 0        | 3                |
| -3       | 1        | 1        | 2.25             |
| -3       | 2        | -1       | 2.064            |
| -3       | 2        | 0        | 2.598            |
| -3       | 2        | 1        | 2.064            |
| -3       | 3        | -1       | 1.701            |
| -3       | 3        | 0        | 1.964            |
| -3       | 3        | 1        | 1.701            |
| -2       | -2       | 0        | 1.788            |
| -2       | -1       | -1       | 2.046            |
| -2       | -1       | 0        | 2.563            |
| -2       | -1       | 1        | 2.046            |

238

239  
240  
241

Table S4.  
NMR chemical shifts. Assigned chemical shifts for simplified motifs compared to those found in the literature<sup>22</sup>.

|        |        | Chemical shift (ppm, measured/literature*) |                     |                                  |                        |    |                        |      |      |                   |                     |                     |            |            |                   |
|--------|--------|--------------------------------------------|---------------------|----------------------------------|------------------------|----|------------------------|------|------|-------------------|---------------------|---------------------|------------|------------|-------------------|
|        |        | HN                                         | HA                  | HB                               | HD                     | HE | HG                     | HD   | HE   | CA                | CB                  | CG                  | CD         | CE         | N                 |
| GAGSGA | G<br>1 | 8.4/8.46*                                  | 4.1/3.89*           |                                  |                        |    |                        |      |      | 44.8/<br>44.7*    |                     |                     |            |            | 108.15/<br>107.9* |
|        | A<br>2 | 8.25/8.25*                                 | 4.25/4.26*          | 1.3/<br>1.33*                    |                        |    |                        |      |      | 52.7/<br>52.2*    | 19.1/<br>18.6*      |                     |            |            | 123.6/1<br>23.5*  |
|        | G<br>3 | 8.48/8.49*                                 | 3.94/3.93*          |                                  |                        |    |                        |      |      | 44.8/<br>44.7*    |                     |                     |            |            | 108.17/<br>108.1* |
|        | S<br>4 | 8.3/8.3*                                   | 4.46/4.4*           | 3.86;3.<br>91/<br>3.81;3.<br>87* |                        |    |                        |      |      | 58.5/<br>58*      | 63.9/<br>63.4*      |                     |            |            | 115.5/<br>115.3*  |
|        | G<br>5 | 8.54/8.55*                                 | 3.96/3.92*          |                                  |                        |    |                        |      |      | 44.8/<br>44.7*    |                     |                     |            |            | 110.9/<br>110.8*  |
|        | A<br>6 | 8.25/8.25*                                 | 4.25/4.26*          | 1.3/<br>1.33*                    |                        |    |                        |      |      | 52.7/<br>52.2*    | 19.1/<br>18.6*      |                     |            |            | 123.6/<br>123.5*  |
| GAGYGA | G<br>1 | 8.41/8.36*                                 | 3.89/3.76;3<br>.84* |                                  |                        |    |                        |      |      | 44.8/<br>44.7*    |                     |                     |            |            | 107.9/<br>107.9*  |
|        | A<br>2 | 8.18/8.17*                                 | 4.30/4.22*          | 1.35/<br>1.3*                    |                        |    |                        |      |      | 52.7/<br>52.2*    | 19.0/<br>18.6*      |                     |            |            | 123.6/<br>123.4*  |
|        | G<br>3 | 8.41/8.39*                                 | 3.76/3.84           |                                  |                        |    |                        |      |      | 44.78/<br>44.7*   |                     |                     |            |            | 108.14/<br>107.9* |
|        | Y<br>4 | 8.1/8.1*                                   | 4.51/4.46*          | 2.9;3.0<br>4/<br>2.85;2.<br>98*  | 7.0<br>7/<br>6.9<br>5* |    | 6.8/<br>6.71*          | 7.06 | 6.78 | 58.2/<br>57.8*    | 38.7/<br>38.3*      |                     | 133<br>.45 | 118.2<br>6 | 119.86/<br>119.8* |
|        | G<br>5 | 8.41/8.41*                                 | 3.94/3.76;3<br>.85* |                                  |                        |    |                        |      |      | 44.8/<br>44.7*    |                     |                     |            |            | 110.68/<br>110.6* |
|        | A<br>6 | 8.18/8.18*                                 | 4.3/4.23*           | 1.3/<br>1.3*                     |                        |    |                        |      |      | 52.7/<br>52.2*    | 19.1/<br>18.6*      |                     |            |            | 123.6/<br>123.4*  |
| GAGVGA | G<br>1 | 8.47/8.39*                                 | 3.89/3.76;3<br>.84* |                                  |                        |    |                        |      |      | 44.8/<br>44.7*    |                     |                     |            |            | 108.15/<br>107.9* |
|        | A<br>2 | 8.19/8.18*                                 | 4.29/4.23*          | 1.3/<br>1.3*                     |                        |    |                        |      |      | 52.7/<br>52.2*    | 19.1/<br>18.6*      |                     |            |            | 123.56/<br>123.4* |
|        | G<br>3 | 8.47/8.37*                                 | 3.89/3.83*          |                                  |                        |    |                        |      |      | 44.8/<br>44.7*    |                     |                     |            |            | 108.15/<br>107.5* |
|        | V<br>4 | 7.98/7.97*                                 | 4.11/4.04*          | 2.06/<br>2*                      |                        |    | 0.8<br>7/<br>0.8<br>3* |      |      | 62.36<br>/<br>62* | 32.63<br>/<br>32.1* | 20.36<br>/<br>20.1* |            |            | 119.18/<br>118.5* |
|        | G<br>5 | 8.52/8.51*                                 | 3.9/3.86*           |                                  |                        |    |                        |      |      | 44.8/<br>44.7*    |                     |                     |            |            | 110.7/<br>110.8*  |
|        | A<br>6 | 8.19/8.18*                                 | 4.29/4.23*          | 1.3/<br>1.3*                     |                        |    |                        |      |      | 52.7/<br>52.2*    | 19.1/<br>18.6*      |                     |            |            | 123.6/<br>123.4*  |

242

243 Table S5.

244 Predicted chemical shifts for simplified motifs within the sixth repetitive domain. Chemical shifts were  
245 predicted using the webserver from SHIFTX2.

|               | HN | HA   | HB   | HD        | HE   | CA    | CB    | CD    | CE     | N      |        |
|---------------|----|------|------|-----------|------|-------|-------|-------|--------|--------|--------|
| <b>GAGSGA</b> | G1 | 8.20 | 4.10 |           |      | 44.50 |       |       |        | 108.00 |        |
|               | A2 | 8.50 | 4.50 | 1.40      |      | 51.40 | 18.70 |       |        | 123.00 |        |
|               | G3 | 8.00 | 4.20 |           |      | 43.80 |       |       |        | 108.20 |        |
|               | S4 | 8.40 | 4.70 | 3.75/3.79 |      | 57.60 | 63.00 |       |        | 115.40 |        |
|               | G5 | 7.90 | 4.10 |           |      | 44.70 |       |       |        | 109.30 |        |
|               | A6 | 8.40 | 4.50 | 1.40      |      | 51.60 | 18.20 |       |        | 122.90 |        |
| <b>GAGYGA</b> | G1 | 8.5  | 3.96 |           |      | 45.24 |       |       |        | 108.7  |        |
|               | A2 | 8.25 | 4.3  | 1.4       |      | 52.7  | 19.1  |       |        | 123.6  |        |
|               | G3 | 8.5  | 3.96 |           |      | 45.24 |       |       |        | 108.7  |        |
|               | Y4 | 8.1  | 4.5  | 2.91/3.03 | 7.06 | 6.78  | 58.16 | 38.77 | 133.45 | 118.26 | 119.88 |
|               | G5 | 8.5  | 3.96 |           |      | 45.24 |       |       |        | 108.7  |        |
|               | A6 | 8.25 | 4.3  | 1.4       |      | 52.7  | 19.1  |       |        | 123.6  |        |

246

247 Table S6.

248 Table with the logarithmic shifts used to calculate the master curves

| Sol master curve |                                     |                                  | Gel master curve |                                     |
|------------------|-------------------------------------|----------------------------------|------------------|-------------------------------------|
| <i>pH</i>        | Log( <i>a<sub>pH</sub></i> ), Freq. | *Log( <i>a<sub>pH</sub></i> ), G | <i>pH</i>        | Log( <i>a<sub>pH</sub></i> ), Freq. |
| 7                | 0                                   | 1.83                             | 7                | 0                                   |
| 8                | -0.86                               | 0                                | 6.5              | 1.23                                |
|                  |                                     |                                  | 6                | 3.14                                |

249 \*Given the suspected lower concentration of the sol fraction at this pH, and knowing that like viscosity, the  
250 moduli follow a power-law relationship with concentration, the moduli were scaled to match that of pH 8,  
251 however leaving the frequency domain unaffected.
